1 **Title:** A bright and high-performance genetically encoded Ca<sup>2+</sup> indicator  
2 based on mNeonGreen fluorescent protein

3  
4 **Authors:** Landon Zarowny<sup>1</sup> (equal contribution), Abhi Aggarwal<sup>1,2</sup> (equal contribution), Virginia  
5 Rutten<sup>2,3</sup>, Ilya Kolb<sup>2</sup>, The GENIE Project<sup>2</sup>, Ronak Patel<sup>2</sup>, Hsin-Yi Huang<sup>4</sup>, Yu-Fen Chang<sup>4</sup>, Tiffany  
6 Phan<sup>1</sup>, Richard Kanyo<sup>5</sup>, Misha Ahrens<sup>2</sup>, W. Ted Allison<sup>5</sup>, Kaspar Podgorski<sup>2</sup>, Robert E.  
7 Campbell<sup>1,6</sup>

## 8 **Affiliations**

9 <sup>1</sup>Department of Chemistry, University of Alberta, Edmonton, Alberta, Canada

10 <sup>2</sup>Janelia Research Campus, Howard Hughes Medical Institute, Ashburn, Virginia, United States

11 <sup>3</sup>Gatsby Computational Neuroscience Unit, UCL, London, UK

12 <sup>4</sup>LumiSTAR Biotechnology, Inc. National Biotechnology Research Park, Taipei City 115, Taiwan

13 <sup>5</sup>Department of Biological Sciences, University of Alberta, Edmonton, Alberta, Canada

14 <sup>6</sup>Department of Chemistry, Graduate School of Science, The University of Tokyo, Tokyo, Japan

15

## 16 **Abstract**

17 Genetically encodable calcium ion (Ca<sup>2+</sup>) indicators (GECIs) based on green fluorescent proteins  
18 (GFP) are powerful tools for imaging of cell signaling and neural activity in model organisms.  
19 Following almost two decades of steady improvements in the *Aequorea victoria* GFP (avGFP)-  
20 based GCaMP series of GECIs, the performance of the most recent generation (i.e., GCaMP7)  
21 may have reached its practical limit due to the inherent properties of GFP. In an effort to sustain  
22 the steady progression towards ever-improved GECIs, we undertook the development of a new  
23 GECI based on the bright monomeric GFP, mNeonGreen (mNG). The resulting indicator, mNG-  
24 GECO1, is 60% brighter than GCaMP6s *in vitro* and provides comparable performance as  
25 demonstrated by imaging Ca<sup>2+</sup> dynamics in cultured cells, primary neurons, and *in vivo* in larval  
26 zebrafish. These results suggest that mNG-GECO1 is a promising next-generation GECI that

27 could inherit the mantle of GCaMP and allow the steady improvement of GECIs to continue for  
28 generations to come.

## 29 Introduction

30 Genetically encodable calcium ion ( $\text{Ca}^{2+}$ ) indicators (GECIs) are a class of single fluorescent  
31 protein (FP)-based biosensors that are powerful tools for the visualization of  $\text{Ca}^{2+}$  concentration  
32 dynamics both *in vitro* and *in vivo*<sup>1,2,3</sup>. As they are genetically encoded, GECI expression can be  
33 genetically targeted to specific cell types or subcellularly localized to specific organelles.  
34 Furthermore, their negligible cellular toxicity, minimal perturbation of endogenous cellular  
35 functions, and biological turnover, make them ideal for long-term imaging experiments<sup>4</sup>. The  $\text{Ca}^{2+}$ -  
36 dependent fluorescent response of GECIs is routinely used as a proxy for neuronal activity due  
37 to the transient changes in  $\text{Ca}^{2+}$  concentration that accompany action potentials<sup>5,6,7,8</sup>. GECIs  
38 have facilitated the optical recording of thousands of neurons simultaneously in the surgically  
39 exposed brains of mice<sup>9</sup>. Despite their widespread use by the scientific community, there are  
40 some properties of GECIs that could be further improved. These properties include faster  $\text{Ca}^{2+}$   
41 response kinetics, higher fluorescent molecular brightness, and minimized contribution to  $\text{Ca}^{2+}$   
42 buffering. Some GECIs have shown aggregation in neurons, and some of the most highly  
43 optimized GECIs have been demonstrated to cause aberrant cortical activity in murine models<sup>10,</sup>  
44 <sup>11,12</sup>.

45 An important issue that is common to all GECIs is their intrinsic  $\text{Ca}^{2+}$  buffering capacity.  
46 The  $\text{Ca}^{2+}$  binding domains of GECIs (calmodulin (CaM) or troponin C (TnC)) act as  $\text{Ca}^{2+}$  buffers  
47 within the cell and must necessarily compete with endogenous proteins for binding to  $\text{Ca}^{2+}$  (Refs.  
48 13, 14, 15, 16). Comprehensive investigations of this phenomenon are limited, but a few reports  
49 have indicated abnormal morphology and behavior of neurons after long term or high expression  
50 of GCaMPs<sup>17</sup>.  $\text{Ca}^{2+}$  buffering and competition for CaM binding sites have been proposed as  
51 possible causes. One solution to the  $\text{Ca}^{2+}$  buffering phenomenon is to reduce the reporter protein  
52 expression, leading to a lower concentration of GECI and reduced buffering capacity. However,  
53 reduced expression requires increased intensity of excitation light to achieve an equivalent  
54 fluorescent signal, which can lead to increased phototoxicity and photobleaching. Another solution  
55 is to reduce the number of  $\text{Ca}^{2+}$  binding sites like that in the TnC-based GECIs, NTnC<sup>18</sup> and  
56 YTnC<sup>19</sup>. Unfortunately, these indicators have relatively low fluorescence response ( $\Delta F/F_{\min} \sim 1$  for  
57 NTnC and  $\sim 10.6$  for YTnC) compared to the recent GCaMP7 variants ( $\Delta F/F_{\min} \sim 21$  to 145)<sup>20</sup>.  
58 Another possible solution is to develop GECIs with increased brightness such that they could be

59 expressed at a lower concentration while retaining a similar fluorescent intensity with similar  
60 intensity of excitation light.

61 Further increasing the brightness of GECIs, while retaining high performance comparable  
62 to the most recent generation of indicators, would provide improved tools for optical imaging of  
63 neuronal activity and decrease the occurrence of experimental artifacts resulting from  $\text{Ca}^{2+}$   
64 buffering and indicator overexpression<sup>17</sup>. Our efforts to realize this advance were inspired, in part,  
65 by the advent of a bright and monomeric engineered version of GFP from *Branchiostoma*  
66 *lanceolatum*, mNeonGreen (mNG)<sup>21</sup>. Due to its high brightness and its excellent performance as  
67 a subcellular localization tag<sup>21</sup>, mNG is an exceptionally promising starting point from which to  
68 develop a brighter GECI.

69 Here we introduce an mNG-based genetically encodable Ca<sup>2+</sup> indicator for optical imaging  
70 (mNG-GECO1) that exceeds the brightness of all variants in the GCaMP series while providing  
71 performance that is comparable to the latest generation GCaMP variants. Key design differences  
72 between mNG-GECO1 and the GCaMP series include the GFP portion (mNG versus avGFP)  
73 and the protein topology (non-circularly permuted mNG versus circularly permuted avGFP).

74

## 75 **Results and Discussion**

### 76 **Rational engineering and iterative directed evolution of mNG-GECO1**

77 We used a combination of rational design, linker sequence optimization, and directed evolution  
78 to develop mNG-GECO1 (**Supplementary Fig. 1**). Starting from an unpublished topological  
79 variant of REX-GECO1<sup>22</sup>, we used PCR to produce a fragment containing CaM linked to the RS20  
80 peptide with a short linker (**Fig. 1a**). Insertion of this PCR fragment into the mNG gene between  
81 residues 136 and 137 (numbering as in PDB ID 5LTR)<sup>23</sup> resulted in a green fluorescent indicator  
82 prototype which we named mNG-GECO0.1 (**Fig. 1**). For the remainder of this manuscript, amino  
83 acids will be numbered as in the sequence alignment provided as **Supplementary Fig. 2**. mNG-  
84 GECO0.1 had a minimal response to  $\text{Ca}^{2+}$  ( $\Delta F/F_{\min} = 0.3$ ), but we anticipated that optimization of  
85 the sequence around the insertion site would yield a suitable template for directed evolution.  
86 Indeed, we found that deletion of Ala146, the residue immediately preceding the insertion of the  
87  $\text{Ca}^{2+}$  sensing domain, substantially improved the response to  $\text{Ca}^{2+}$  (mNG-GECO0.2;  $\Delta F/F_{\min} \sim 2$ ).

88 Starting from mNG-GECO0.2, we began a process of iterative directed evolution which  
89 involved screening of libraries created from error-prone PCR or site saturation mutagenesis to  
90 identify variants with increased brightness and increased response to  $\text{Ca}^{2+}$ . In our primary library  
91 screen, we used a fluorescent colony screening system equipped with excitation and emission  
92 filters appropriate for imaging of green fluorescence<sup>24</sup>. Bright colonies were picked and cultured  
93 overnight in liquid media. A secondary screen for  $\text{Ca}^{2+}$  sensitivity was performed the next day  
94 using detergent-extracted bacterial lysate. The fluorescence of the lysate for each variant was  
95 measured in  $\text{Ca}^{2+}$  chelating buffer (30 mM MOPS, 100 mM KCl, 10 mM EGTA, pH 7.3), and  
96 subsequently in  $\text{Ca}^{2+}$  saturating buffer (30 mM MOPS, 100 mM KCl, 10 mM  $\text{Ca}^{2+}$ , pH 7.3). Dividing  
97 the  $\text{Ca}^{2+}$  saturated fluorescence by the  $\text{Ca}^{2+}$  free fluorescence provided an approximate but robust  
98 measure of each indicator variant's response to  $\text{Ca}^{2+}$ . For each round of screening the plasmids  
99 were isolated for the 6-10 most promising variants and sent for sequencing. The pool of these  
100 most promising variants was used as the template for the next round of library creation and  
101 directed evolution.

102 Following 7 rounds of iterative directed evolution, *E. coli* colonies harboring mNG-  
103 GECO0.7 were brightly fluorescent after overnight incubation. However, the  $\text{Ca}^{2+}$  response of  
104 mNG-GECO0.7 was remained relatively low ( $\Delta F/F_{\min} \sim 5$ ), relative to recent generation GCaMP  
105 variants. We anticipated that optimization of the linkers connecting mNG to the CaM-RS20  
106 domain (mNG-CaM linker and RS20-mNG linker) could lead to the identification of variants with  
107 improved responses. To optimize these linker regions, we used site saturation mutagenesis to  
108 produce libraries of all 20 amino acids within the 3 residues connecting mNG to CaM. Individual  
109 libraries of Leu133, Thr134, and Ala135 were randomized to all 20 amino acids. If a beneficial  
110 mutation was found, the process was repeated for the remaining amino acids until these libraries  
111 were exhausted. By screening of these libraries, we identified two mutations of the linker region  
112 between mNG barrel and CaM: Ala145Gly and Leu143Ile. This variant, mNG-GECO0.9, had a  
113  $\Delta F/F_{\min} \sim 12$  as measured *in vitro*.

114 Following optimization of the mNG-CaM linker, multiple site saturation libraries were  
115 created, using the same methodology as the mNG-CaM linker, for the RS20-mNG linker region  
116 (residues Glu323, Trp324, Cys325 and Arg326). Screening of these libraries led to the  
117 identification of a particularly bright variant with a Cys325Asn mutation. This variant, designated  
118 mNG-GECO0.9.1, is brighter than mNG-GECO0.9 but has a decreased response to  $\text{Ca}^{2+}$  of  
119  $\Delta F/F_{\min} = 3.5$ . In an effort to improve the performance of mNG-GECO0.9.1, we applied site  
120 saturations to positions previously found to be mutated during directed evolution. Screening of

121 these libraries for variants with increased brightness and higher  $\Delta F/F_{\min}$  led to the identification of  
122 a variant with Asp206Gly, Phe209Leu, Pro263Phe, Lys265Ser, Thr346Ile and the reversion of  
123 Gly152Glu. This variant was designated as mNG-GECO1. A notable observation from the  
124 directed evolution efforts is the minimal number of mutations in the mNG domain. Only 2  
125 mutations (Lys128Glu and Thr346Ile) were outside the  $\beta$ -strand in which the  $\text{Ca}^{2+}$  sensing domain  
126 was inserted. In contrast, 3 mutations were localized to the  $\beta$ -strand surrounding the sensing  
127 domain insertion site (Leu143Ile/Ala145Gly/Cys325Asn) and 7 mutations were localized to the  
128 CaM domain (Thr151Ala/Thr180Cys/Asp206Gly/Phe209Leu/Pro263Phe/Lys265Ser/Ala293Gly).

### 129 ***In vitro* characterization of mNG-GECO1**

130 We characterized mNG-GECO1, in parallel with GCaMP6s, for direct comparison of biophysical  
131 properties measured under identical conditions (**Supplementary Table 1**). We found that the  
132 excitation (ex) and emission (em) maxima of the  $\text{Ca}^{2+}$  saturated states to be 497 nm (ex) and 512  
133 nm (em) for GCaMP6s and 496 nm (ex) and 513 nm (em) for mNG-GECO1 (**Fig. 1**). The *in vitro*  
134  $\text{Ca}^{2+}$  response of mNG-GECO1 ( $\Delta F/F_{\min} = 35$ ) was similar to that of GCaMP6s when tested in  
135 parallel ( $\Delta F/F_{\min} = 39$ ). The  $K_d$  of mNG-GECO1 (810 nM) is substantially higher than that of  
136 GCaMP6s (147 nM). This increase in  $K_d$  is consistent with the faster  $k_{\text{off}}$  kinetics of mNG-GECO1  
137 ( $k_{\text{off}} = 1.57 \pm 0.01 \text{ s}^{-1}$ ) relative to GCaMP6s ( $k_{\text{off}} = 1.06 \pm 0.01 \text{ s}^{-1}$ ). There was no noticeable  
138 difference observed between the  $k_{\text{on}}$  kinetics of mNG-GECO1 and GCaMP6s with varying  
139 concentrations of  $\text{Ca}^{2+}$  (**Supplementary Fig. 3**).

140 In the  $\text{Ca}^{2+}$  bound state, mNG-GECO1 has an extinction coefficient of  $102,000 \text{ M}^{-1}\text{cm}^{-1}$   
141 and quantum yield of 0.69, giving it an overall brightness (= EC \* QY) of 70. This value is similar  
142 to the value of 77 previously reported for NTnC<sup>18</sup> and 78% of the brightness of mNG itself  
143 (measured by us to be  $112,000 \text{ M}^{-1}\text{cm}^{-1} * 0.8 = 90$ ) (**Supplementary Fig. 4**). Under two-photon  
144 excitation conditions, both mNG-GECO1 and GCaMP6s have a maximal two-photon cross  
145 section at  $\sim 970 \text{ nm}$  and similar action cross-section (AXS) values of 37.22 GM for mNG-GECO1  
146 and 38.81 GM for GCaMP6s. However, due to its higher brightness at the single molecule level,  
147 the molecular brightness of mNG-GECO1 (21.3) is higher than that of GCaMP6s (16.1) at 15 mW  
148 power. Overall, these data indicate the mNG-GECO1 has excellent one-photon and two-photon  
149 excitation properties *in vitro*.

150

## 151 **In vitro characterization in cultured cells and dissociated neurons**

152 To compare the performance of mNG-GECO1 and GCaMP6s in cultured cells, we transfected  
153 HeLa cells with mNG-GECO1 in a pcDNA vector (CMV promoter) in parallel with pGP-CMV-  
154 GCaMP6s. Using a previously reported protocol<sup>25</sup>, Ca<sup>2+</sup> oscillations were induced by treatment  
155 with histamine and fluorescence images were acquired every 10 seconds for 20 minutes. From  
156 the intensity versus time data for each cell,  $\Delta F/F_0$  for all oscillations of  $\Delta F/F_0 > 0.5$  were extracted  
157 using a Matlab script. Using these extracted  $\Delta F/F_0$  values, average  $\Delta F/F_0$  for all oscillations and  
158 maximum  $\Delta F/F_0$  was computed. The average maximum  $\Delta F/F_0$  was calculated by averaging the  
159 maximum  $\Delta F/F_0$  from each responding cell. In parallel experiments, mNG-GECO1 had an average  
160  $\Delta F/F_0 = 4.50 \pm 2.96$  compared to GCaMP6s'  $\Delta F/F_0 = 3.48 \pm 2.40$  (**Fig. 1h**). The maximum  $\Delta F/F_0$   
161 was  $16.8 \pm 10.5$  for mNG-GECO1 and  $12.8 \pm 6.11$  for GCaMP6s. At the end of the 20-minute  
162 imaging experiment, the cells were treated with ionomycin/Ca<sup>2+</sup> to saturate the indicators and  
163 induce a fluorescent maximum and then with Ca<sup>2+</sup> chelator EGTA/ionomycin to deplete Ca<sup>2+</sup> and  
164 produce a fluorescent minimum. For these treatments,  $\Delta F/F_{\min} = 48.8 \pm 15.1$  for mNG-GECO1  
165 and  $\Delta F/F_{\min} = 16.7 \pm 5.2$  for GCaMP6s. These results were obtained from a data set of 137  
166 responding cells with 1624 individual oscillations for mNG-GECO1 and 99 responding cells with  
167 687 individual oscillations for GCaMP6s (**Supplementary Table 2**).

168 We next characterized the performance of mNG-GECO1 in dissociated rat cortical  
169 neurons alongside GCaMP series indicators GCaMP6s, jGCaMP7s, jGCaMP7b, jGCaMP7c, and  
170 jGCaMP7f (**Fig. 2**). Field stimulated neurons expressing mNG-GECO1 had a single action  
171 potential (AP)  $\Delta F/F_0 = 0.19 \pm 0.04$ , slightly lower than that of GCaMP6s ( $\Delta F/F_0 = 0.27 \pm 0.09$ , **Fig.**  
172 **2a**). For 10 APs, performance of mNG-GECO1 was approximately twofold lower than GCaMP6s,  
173 with  $\Delta F/F_0$  of  $1.5 \pm 0.19$  and  $3.1 \pm 0.26$  for mNG-GECO1 and GCaMP6s, respectively (**Fig. 2b**).  
174 At 160 APs, mNG-GECO1 has a  $\Delta F/F_0$  of  $6.5 \pm 0.8$ , slightly lower than GCaMP6s's  $\Delta F/F_0$  of  $9.0 \pm$   
175  $0.47$  (**Fig. 2c**). The baseline brightness of mNG-GECO1 ( $1,374 \pm 31$  AU) was comparable to the  
176 baseline brightness of GCaMP6s ( $1,302 \pm 6$  AU) and jGCaMP7s ( $1,397 \pm 11$  AU) (**Fig. 2e**). The  
177 signal-to-noise ratio (SNR) of mNG-GECO1 and GCaMP6s are comparable for 1 and 3 AP's (**Fig.**  
178 **2f**). For 3 AP stimulation, mNG-GECO1 exhibited a half rise time of  $49 \pm 1$  ms and half decay time  
179 of  $582 \pm 12$  ms. Under the same conditions, GCaMP6s exhibited a half rise time of  $65 \pm 2$  ms and  
180 a half decay time of  $1,000 \pm 36$  ms. Field stimulated neuron data is summarized in  
181 **Supplementary Table 3**. The overall data in cultured neuron suggest that the mNG-GECO1  
182 sensor is comparable in signal, kinetics, and baseline brightness to the GCaMP6s sensor.

### 183 ***In vivo* evaluation of mNG-GECO1**

184 To evaluate mNG-GECO1 for *in vivo* expression in zebrafish neurons, we used a Tol2  
185 transposase transgenesis system to deliver mNG-GECO1 or GCaMP6s under a pan-neuronal  
186 Elavl3 promoter into zebrafish embryos<sup>26</sup>. We tracked expression of mNG-GECO1 over several  
187 days to evaluate the viability of transgenic fish (**Supplementary Fig. 5**). We found no obvious  
188 morphological anomalies during larval development stage of zebrafish expressing mNG-GECO1  
189 or GCaMP6s.

190 To evaluate the relative performance of mNG-GECO1 and GCaMP6s for imaging of  
191 neuronal activity in zebrafish larvae, we used the same transgenesis protocol to produce *Casper*  
192 zebrafish lines expressing each indicator (**Fig. 3**). Prior to imaging, 5-6 days post fertilization  
193 *Casper* fish expressing the sensors were immobilized with bungarotoxin (1 mg/mL) for 30 seconds  
194 followed by a 10 minute incubation in the convulsant 80 mM 4-aminopyridine (4-AP). The fish  
195 were then placed in low melting agar and immersed in a solution of 4-AP (80 mM). Imaging  
196 consisted of 5 minute intervals of the hindbrain or midbrain at a recording rate of 3 Hz. For each  
197 indicator, 5 fish were imaged under 6 different field of views resulting in 834 and 1280 individual  
198 cells for mNG-GECO1 and GCaMP6s, respectively (**Supplementary Fig. 6**). The resulting data  
199 was evaluated using the Suite2p package (<https://github.com/MouseLand/suite2p>)<sup>27</sup>. We found  
200 that mNG-GECO1 had a maximum  $\Delta F/F_0$  for each cell of  $3.09 \pm 0.08$  compared to  $4.56 \pm 0.11$  for  
201 GCaMP6s (**Fig. 3c**). The baseline fluorescence of GCaMP6s was higher compared to mNG-  
202 GECO1 ( $0.95 \pm 0.03$  vs  $1.41 \pm 0.05$  AU, respectively) (**Fig. 3d**). However, the signal-to-noise ratio  
203 (SNR), which was computed by dividing the  $\Delta F/F_0$  by the raw standard deviation of each cell in  
204 six field of views, was higher for mNG-GECO1 (SNR =  $6.63 \pm 0.07$ ) than GCaMP6s (SNR =  $5.25$   
205  $\pm 0.04$ ) (**Fig. 3e**). We also found that mNG-GECO1 had a slower decay time (faster  $k_{off}$  kinetics)  
206 compared to GCaMP6s ( $1.98 \pm 0.12$  s<sup>-1</sup> vs  $3.00 \pm 0.12$  s<sup>-1</sup>, respectively) (**Fig. 3f**). The overall data  
207 in zebrafish neurons suggest that mNG-GECO1 is comparable in signal-to-noise ratio, kinetics,  
208 and baseline brightness to the GCaMP6s sensor (**Supplementary Table 4**).

### 209 **Ca<sup>2+</sup> imaging in human iPSC-derived cardiomyocytes**

210 Chemical Ca<sup>2+</sup> dyes such as Fluo-4 acetoxymethyl (AM), Rhod-2 AM and Fura-2 AM are often  
211 used to phenotype Ca<sup>2+</sup> transients in induced pluripotent stem cell-derived cardiomyocytes (iSPC-  
212 CM). However, these dyes can be toxic<sup>28, 29</sup> and may potentially suppress the activity of Na<sup>+</sup> and  
213 K<sup>+</sup>-dependent adenosine triphosphatase<sup>30</sup>. As such, we tested whether mNG-GECO1 could serve

214 as a robust tool for observing cells signaling and drug response while preventing cellular toxicity  
215 in iPSC-CMs (**Supplementary Fig. 7**). We found that when iPSC-CMs expressing mNG-GECO1  
216 o Fluo-4 AM were treated with 20 mM caffeine, mNG-GECO1 had a 2.8 fold higher  $\Delta F/F$  response  
217 than Fluo-4 ( $\Delta F/F = 11.77 \pm 2.82$  and  $4.18 \pm 1.27$ , respectively) (**Supplementary Fig. 7a, b**).  
218 However, when cells were subjected to 0.33 Hz electrical stimulation for 30 minutes, mNG-  
219 GECO1 had a slightly lower peak  $\Delta F/F$  ( $2.26 \pm 0.81$ ) than Fluo-4 AM ( $3.31 \pm 1.42$ )  
220 (**Supplementary Fig. 7c, d**). We suspect that this discrepancy is due to mNG-GECO1s lower  
221 affinity for  $Ca^{2+}$ . When we stimulated the cells in the presence of 20 mM caffeine, the max  $\Delta F/F$   
222 of mNG-GECO1 ( $\Delta F/F = 14.20 \pm 4.67$ ) was higher than the max  $\Delta F/F$  of Fluo-4 AM ( $\Delta F/F = 6.73$   
223  $\pm 1.19$ ) (**Supplementary Fig. 7e, f**). Based on this data, we propose that mNG-GECO1 may serve  
224 as a useful tool for phenotypic screening and functional tests in iPSC-CMs.

225

## 226 **Conclusion**

227 mNG-GECO1 is a new, first-generation, genetically encodable  $Ca^{2+}$  indicator that provides  
228 performance comparable to 6<sup>th</sup> and 7<sup>th</sup> generation GCaMP indicators. We have demonstrated that  
229 the *in vitro* performance of mNG-GECO1 in cultured HeLa cells is on par or better than GCaMP6s.  
230 However, *in vitro* cultured neuron benchmarking as well as *in vivo* imaging in transgenic zebrafish  
231 larvae have indicated that further directed evolution efforts will be required to produce an mNG-  
232 GECO1 variant that provides substantial advantages relative to the jGCaMP7 series. Further  
233 development of this indicator may come from increasing the  $Ca^{2+}$  affinity which would enable more  
234 accurate single spike detection. In summary, we have developed a first generation GECl from the  
235 mNG scaffold that retains the high fluorescent brightness *in vitro* with performance comparable  
236 to the state-of-the-art GECl, GCaMP6s. We expect mNG-GECO1 to be just as amenable to  
237 further optimization as the first generation GCaMP, and so mNG-GECO1 is likely to serve as the  
238 parent of a new and improved lineage of high performance GEClS.

## 239 **Author contributions**

240 LZ, AA, and TP performed the directed evolution experiments and *in vitro* characterization. RP  
241 performed the *in vitro* 2P characterization, IK and TGP conducted and analyzed the cultured  
242 neuron experiments. RK conducted the initial expression experiments of mNG-GECO1 and its  
243 variants in zebrafish under the supervision of WTA. VR completed the zebrafish characterization



244 under the supervision of MA. HYH and YFC did the experiments in human iPSC-derived  
245 cardiomyocytes. LZ, AA, KP, and REC wrote and edited the manuscript. All authors were allowed  
246 to review and edit the manuscript before publication.

247

## 248 **Acknowledgments**

249 We thank the University of Alberta Molecular Biology Services Unit (Alberta) and Molecular Bio  
250 (Janelia) for technical support. We thank Christopher Cairo (Alberta), Andy Holt (Alberta) and  
251 Loren Looger (Janelia) for providing access to the instrumentation, Eric Schreiter (Janelia) for  
252 providing access to resources and for useful feedback regarding the manuscript. We thank  
253 Deepika Walpia (Janelia) and the JRC Histology group for preparing cultured neurons. We thank  
254 John Macklin (Janelia) for overseeing two-photon measurements. We thank Nathan Shaner for  
255 the mNeonGreen fluorescent protein. REC acknowledges the Japan Society for the Promotion of  
256 Science (JSPS), Natural Sciences and Engineering Research Council of Canada (NSERC), and  
257 Canadian Institutes of Health Research (CIHR), for funding support. The mNG gene was a kind  
258 gift from Jiwu Wang at Allele Biotech.

259

## 260 **References**

- 261 1. Mank M, Griesbeck O. Genetically encoded calcium indicators. *Chem Rev* **108**, 1550-1564 (2008).
- 262 2. Akerboom J, *et al.* Optimization of a GCaMP Calcium Indicator for Neural Activity Imaging. *J*  
263 *Neurosci* **32**, 13819-13840 (2012).
- 264 3. Knopfel T. Genetically encoded optical indicators for the analysis of neuronal circuits. *Nat Rev*  
265 *Neurosci* **13**, 687-700 (2012).
- 266 4. Chen TW, *et al.* Ultrasensitive fluorescent proteins for imaging neuronal activity. *Nature* **499**,  
267 295-300 (2013).
- 268 5. Pologruto TA, Yasuda R, Svoboda K. Monitoring neural activity and [Ca<sup>2+</sup>] with genetically  
269 encoded Ca<sup>2+</sup> indicators. *J Neurosci* **24**, 9572-9579 (2004).
- 270 6. Tian L, Akerboom J, Schreiter ER, Looger LL. Neural activity imaging with genetically encoded  
271 calcium indicators. *Prog Brain Res* **196**, 79-94 (2012).
- 272 7. Deo C, Lavis LD. Synthetic and genetically encoded fluorescent neural activity indicators. *Curr*  
273 *Opin Neurobiol* **50**, 101-108 (2018).
- 274 8. Broussard GJ, Liang R, Tian L. Monitoring activity in neural circuits with genetically encoded  
275 indicators. *Front Mol Neuro* **7**, 1-17 (2014).
- 276 9. Kim TH, *et al.* Long-Term Optical Access to an Estimated One Million Neurons in the Live Mouse  
277 Cortex. *Cell Rep* **17**, 3385-3394 (2016).

- 278 10. Podor B, Hu YL, Ohkura M, Nakai J, Croll R, Fine A. Comparison of genetically encoded calcium  
279 indicators for monitoring action potentials in mammalian brain by two-photon excitation  
280 fluorescence microscopy. *Neurophotonics* **2**, 1-7 (2015).
- 281 11. Bootman MD, Allman S, Rietdorf K, Bultynck G. Deleterious effects of calcium indicators within  
282 cells; an inconvenient truth. *Cell Calcium* **73**, 82-87 (2018).
- 283 12. Steinmetz NA, *et al.* Aberrant Cortical Activity in Multiple GCaMP6-Expressing Transgenic Mouse  
284 Lines. *eNeuro* **4**, 1-15 (2017).
- 285 13. Helmchen F, Imoto K, Sakmann B. Ca<sup>2+</sup> buffering and action potential-evoked Ca<sup>2+</sup> signaling in  
286 dendrites of pyramidal neurons. *Biophys J* **70**, 1069-1081 (1996).
- 287 14. Ashworth R, Zimprich F, Bolsover SR. Buffering intracellular calcium disrupts motoneuron  
288 development in intact zebrafish embryos. *Dev Brain Res* **129**, 169-179 (2001).
- 289 15. Briston SJ, Dibb KM, Solaro RJ, Eisner DA, Trafford AW. Balanced changes in Ca buffering by  
290 SERCA and troponin contribute to Ca handling during  $\beta$ -adrenergic stimulation in cardiac  
291 myocytes. *Cardiovascular Res* **104**, 347-354 (2014).
- 292 16. Timofeeva Y, Volynski KE. Calmodulin as a major calcium buffer shaping vesicular release and  
293 short-term synaptic plasticity: facilitation through buffer dislocation. *Front Cell Neuro* **9**, 239-239  
294 (2015).
- 295 17. Yang Y, *et al.* Improved calcium sensor GCaMP-X overcomes the calcium channel perturbations  
296 induced by the calmodulin in GCaMP. *Nat Commun* **9**, 1-18 (2018).
- 297 18. Barykina NV, *et al.* A new design for a green calcium indicator with a smaller size and a reduced  
298 number of calcium-binding sites. *Sci Rep* **6**, 1-15 (2016).
- 299 19. Barykina NV, *et al.* NTnC-like genetically encoded calcium indicator with a positive and enhanced  
300 response and fast kinetics. *Sci Rep* **8**, 1-19 (2018).
- 301 20. Dana H, *et al.* High-performance calcium sensors for imaging activity in neuronal populations  
302 and microcompartments. *Nat Methods* **16**, 649-657 (2019).
- 303 21. Shaner NC, *et al.* A bright monomeric green fluorescent protein derived from Branchiostoma  
304 lanceolatum. *Nat Methods* **10**, 407-409 (2013).
- 305 22. Wu J, *et al.* A long Stokes shift red fluorescent Ca<sup>2+</sup> indicator protein for two-photon and  
306 ratiometric imaging. *Nat Commun* **5**, 1-11 (2014).
- 307 23. Clavel D, *et al.* Structural analysis of the bright monomeric yellow-green fluorescent protein  
308 mNeonGreen obtained by directed evolution. *Acta Crystallogr, Sect D* **72**, 1298-1307 (2016).
- 309 24. Ai H-w, Baird MA, Shen Y, Davidson MW, Campbell RE. Engineering and characterizing  
310 monomeric fluorescent proteins for live-cell imaging applications. *Nat Protoc* **9**, 910-928 (2014).
- 311 25. Palmer AE, Tsien RY. Measuring calcium signaling using genetically targetable fluorescent  
312 indicators. *Nat Protoc* **1**, 1057-1065 (2006).
- 313 26. Kawakami K, Takeda H, Kawakami N, Kobayashi M, Matsuda N, Mishina M. A Transposon-  
314 Mediated Gene Trap Approach Identifies Developmentally Regulated Genes in Zebrafish. *Dev*  
315 *Cell* **7**, 133-144 (2004).
- 316 27. Pachitariu M, *et al.* Suite2p: beyond 10,000 neurons with standard two-photon microscopy.  
317 *bioRxiv*, 1-30 (2017).
- 318 28. Shinnawi R, *et al.* Monitoring Human-Induced Pluripotent Stem Cell-Derived Cardiomyocytes  
319 with Genetically Encoded Calcium and Voltage Fluorescent Reporters. *Stem Cell Reports* **5**, 582-  
320 596 (2015).
- 321 29. Chang Y-F, *et al.* Non-invasive phenotyping and drug testing in single cardiomyocytes or beta-  
322 cells by calcium imaging and optogenetics. *PLOS ONE* **12**, 1-17 (2017).
- 323 30. Smith NA, Kress BT, Lu Y, Chandler-Militello D, Benraiss A, Nedergaard M. Fluorescent Ca<sup>2+</sup>  
324 indicators directly inhibit the Na,K-ATPase and disrupt cellular functions. *Science Signaling* **11**, 1-  
325 14 (2018).

- 326 31. Cranfill PJ, *et al.* Quantitative assessment of fluorescent proteins. *Nat Methods* **13**, 557-562  
327 (2016).
- 328 32. Tsien R, Pozzan T. [14] Measurement of cytosolic free Ca<sup>2+</sup> with quin2. In: *Methods Enzymol*.  
329 Academic Press (1989).
- 330 33. Dweck D, Reyes-Alfonso A, Potter JD. Expanding the range of free calcium regulation in  
331 biological solutions. *Anal Biochem* **347**, 303-315 (2005).
- 332 34. Xu C, Webb WW. Measurement of two-photon excitation cross sections of molecular  
333 fluorophores with data from 690 to 1050 nm. *J Opt Soc Am B: Opt Phys* **13**, 481-491 (1996).
- 334 35. Mütze J, *et al.* Excitation Spectra and Brightness Optimization of Two-Photon Excited Probes.  
335 *Biophysical Journal* **102**, 934-944 (2012).
- 336 36. Palmer AE, Tsien RY. Measuring calcium signaling using genetically targetable fluorescent  
337 indicators. *Nat Protoc* **1**, 1057-1065 (2006).
- 338 37. Wardill TJ, *et al.* A Neuron-Based Screening Platform for Optimizing Genetically-Encoded  
339 Calcium Indicators. *PLOS ONE* **8**, e77728 (2013).
- 340 38. Thorn RJ, Clift DE, Ojo O, Colwill RM, Creton R. The loss and recovery of vertebrate vision  
341 examined in microplates. *PLOS ONE* **12**, 1-17 (2017).

342

## 343 **Methods**

### 344 **General procedures**

345 Synthetic DNA oligonucleotides and gBlocks were purchased from Integrated DNA Technologies.  
346 Plastic consumables, restriction endonucleases, Taq polymerase, Phusion polymerase, T4 DNA  
347 ligase, deoxynucleotides, DH10B *E. coli*, pBAD/His B plasmid, pcDNA3.1(+) plasmid, Bacterial  
348 Protein Extraction Reagent (B-PER), Penicillin-Streptomycin, Fetal Bovine Serum (FBS),  
349 TurboFect, Lipofectamine 2000, and GeneJet gel or plasmid purification kits were purchased from  
350 Thermo Scientific. Endotoxin-free plasmid DNA isolation kits were purchased from Qiagen (cat.  
351 12362). Agarose,  $MnCl_2 \cdot 4H_2O$ , tryptone, D-glucose, ampicillin, L-arabinose, Hank's balanced salt  
352 solution (HBSS), DMEM, TrypLE Express, and LB Lennox media were purchased from Fisher  
353 Scientific. NbActiv4 and neuron transfection media were purchased from Brain Bits.

354 3-(N-morpholino)propanesulfonic acid (MOPS), ethylene glycol-bis(2-aminoethylether)-  
355 N,N,N',N'-tetraacetic acid (EGTA), and nitrilotriacetic acid (NTA), were purchased from VWR.  
356 Nickel NTA immobilized metal affinity chromatography protein purification beads were purchased  
357 from G-BioSciences. Ionomycin and tricaine methanesulfonate were purchased from Millipore-  
358 Sigma. Ethidium bromide and PCR machines (T100 Thermal Cycler) were purchased from  
359 BioRad. Gibson Assembly reagent was purchased from New England Biolabs (NEB). Genemorph  
360 II Random Mutagenesis kits and QuikChange mutagenesis kits were purchased from Agilent  
361 Technologies. Nunc 96-Well Polypropylene DeepWell Storage Plates (cat. 278743) and 96-well  
362 Nunc MicroWell 96-Well Optical-Bottom Plates (cat. 265301) were purchased from Thermo  
363 Scientific. Molecular weight cut off filters were purchased from Millipore-Sigma. Sequencing was  
364 completed by the Molecular Biology Services Unit at the University of Alberta.

### 365 **Molecular biology and protein engineering**

366 Libraries for iterative directed evolution were created using Genemorph II Random Mutagenesis  
367 kits and NEB's Gibson Assembly reagent. Blunt ended linear DNA fragments with random  
368 mutations are created using the Genemorph II kit according to the manufacturer's  
369 recommendations. Genemorph II PCR product was ligated using NEB Gibson Assembly reagent  
370 into a linearized pBAD vector cut with XhoI/HindIII. Site saturation mutagenesis libraries were  
371 created using single and multi QuikChange mutagenesis kits according the manufacturers  
372 recommendations.

373 Libraries are transformed into DH10B *E. coli* and plated on 100 µg/L ampicillin/1.5% agar plates  
374 with 0.02% L-arabinose and grown overnight (12-18 hours) at 37 °C. Colonies are selected on  
375 the basis of fluorescence intensity, picked, and placed into 96 DeepWell blocks containing 1.3 mL  
376 of LB Lennox media supplemented with 100 µg/mL ampicillin and 0.02% L-arabinose. Deepwell  
377 blocks were shaken overnight at 37 °C. The next day, blocks are centrifuged at 6000 × g for 5  
378 minutes to pellet cells. Media was discarded and 30 µL of B-PER was added to each well. After  
379 shaking for 15 minutes, 200 µL of 10 mM EGTA in 30 mM MOPS/100 mM KCl pH 7.2 (MOPS/KCl  
380 buffer) is added to each well of the blocks before mixing briefly and being centrifuged again for 5  
381 minutes at 6000 × g. 90 µL of the resulting lysate is loaded in each well of 96-well optical bottom  
382 plates. Fluorescence intensity for each well of the plate is then read with a Tecan Safire<sup>2</sup>  
383 microplate reader to determine the low Ca<sup>2+</sup> intensity for each variant. High Ca<sup>2+</sup> intensity is  
384 acquired by adding 15 µL of 100 mM Ca<sup>2+</sup> in 30 mM MOPS pH 7.2 with a 60 second shake before  
385 reading. Taking the value of the high Ca<sup>2+</sup> intensity divided by the low Ca<sup>2+</sup> intensity gives a  
386 relative sensitivity value. Promising candidates, usually 10% of each 96-well block, are retested  
387 from the lysate in 10 mM low (EGTA chelated) and 10 mM high Ca<sup>2+</sup> solution diluted in MOPS/KCl  
388 buffer. The plasmids associated with the promising variants are sent for sequencing and used as  
389 template for the next round of directed evolution. For cultured neuron field stimulation  
390 experiments, GCaMP6s, jGCaMP7f, jGCaMP7s, jGCaMP7c, and jGCaMP7b plasmids (available  
391 on Addgene) were subcloned into a syn-<GCaMP>-IRES-mCherry-WPRE-pA vector.

392 Constructs for zebrafish transfection were created by ligating mNG-GECO1 PCR product into a  
393 Tol2 transposon backbone. Briefly, PCR of mNG-GECO variants were ligated into Tol2-HuC-H2B  
394 vector (Addgene plasmid #59530) cut with Sall/Agel using Gibson Assembly. The ligated  
395 constructs were transformed into NEB Turbo Competent *E. coli* cells and grown in 250 µL culture  
396 overnight at 30 °C. The next day, the culture is pelleted, and the DNA is purified using endotoxin-  
397 free plasmid DNA purification protocol using EndoFree Plasmid Maxi Kit. The DNA is eluted with  
398 EF-free H<sub>2</sub>O and verified by sequencing.

### 399 **Protein purification and *in vitro* characterization**

400 To purify mNG, mNG-GECO variants, and GCaMP6s for *in vitro* characterization, pBAD/His B  
401 plasmid containing the gene of interest was used to transform electrocompetent DH10B *E. coli*,  
402 which were then streaked on 100 µg/mL ampicillin/1.5% agar plates. After overnight incubation at  
403 37 °C, a single colony was picked and inoculated to a 2 L flask containing 500 mL of 100 µg/mL  
404 ampicillin/0.02% L-arabinose liquid media and cultured for 24-30 hours at 37 °C. The culture is

405 then centrifuged at  $6000 \times g$  for 6 minutes to collect the cells. Cells are re-suspended in 30 mL of  
406 cold Tris buffered saline (TBS, 150 mM NaCl, 50 mM Tris-HCl) pH 8.0 and lysed by sonication  
407 (QSonica Q700, amplitude 50, 1 second on, 2 seconds off, 3 minutes sonication time). All  
408 subsequent purification procedures were performed on ice. The resulting lysate was clarified of  
409 cell debris by centrifugation for 1 hour at  $21,000 \times g$ , filtered through a Kim-wipe into a 50 mL  
410 conical bottom tube, and incubated for 3 hours with Ni-NTA resin. Resin containing NTA bound  
411 protein was washed with 100 mL of 20 mM imidazole TBS wash buffer and eluted with 250 mM  
412 imidazole TBS elution buffer. Purified protein was buffer exchanged into TBS using a 10,000 Da  
413 molecular weight cut-off filter (Millipore-Sigma) through 3 successive washes. Absorption spectra  
414 were recorded on a Beckman-Coulter DU-800 UV-visible spectrophotometer and fluorescence  
415 spectra recorded on a Tecan Safire<sup>2</sup> plate reader.

416 Extinction coefficient determination for mNG-GECO variants were performed using the alkaline  
417 denaturation method with mNG as a standard<sup>31</sup>. Briefly, the concentration of protein was adjusted  
418 by dilution in MOPS/KCl pH 7.2 to reach an absorbance of 0.6 to 1.0. A dilution series with  
419 MOPS/KCl and 10 mM  $\text{Ca}^{2+}$  was then prepared with absorbances of 0.01, 0.02, 0.03, 0.04, and  
420 0.05 for mNG, mNG-GECO variants, and GCaMP6s. Integration of the fluorescent peaks provides  
421 a total fluorescent emission value which was plotted against the absorbance to provide a slope.  
422 The quantum yields of mNG-GECO variants were determined using the published<sup>31</sup> QY value of  
423 mNG in a ratiometric manner:

$$424 \quad \Phi_{\text{protein}} = \Phi_{\text{standard}} \times (S_{\text{protein}}/S_{\text{standard}})$$

425 Extinction coefficients were determined by measuring the absorption spectrum in MOPS/KCl pH  
426 7.2 and 2 M NaOH. The absorbance value for the denatured GFP peak at 440 nm was divided  
427 by the previously determined extinction coefficient of  $44,000 \text{ M}^{-1}\text{cm}^{-1}$  to give the concentration of  
428 protein<sup>31</sup>. Using Beer's law, the extinction coefficient was then determined by dividing the TBS  
429 sample absorbance maximum by the calculated protein concentration.

430 Determination of  $K_d$  was performed as previously described<sup>32,33</sup>. Briefly, a reciprocal dilution series  
431 was created with either 10 mM EGTA/10 mM  $\text{Ca}^{2+}$  EGTA ranging in free  $\text{Ca}^{2+}$  concentration of 0  
432 to 0.039 mM or 10 mM NTA/10 mM  $\text{Ca}^{2+}$  NTA ranging in free  $\text{Ca}^{2+}$  concentration from 0 to 1.13  
433 mM<sup>33</sup>. An equal amount of purified mNG-GECO was diluted 100 $\times$  into 100  $\mu\text{L}$  of buffer and the  
434 intensity plotted against free  $\text{Ca}^{2+}$  in triplicate. The data are then fit to a four-parameter variable-  
435 slope in GraphPad Prism 7 software to determine the  $K_d$ .

## 436 **Two Photon Measurements**

437 The two photon measurements were performed in 39  $\mu\text{M}$  free  $\text{Ca}^{2+}$  (+ $\text{Ca}^{2+}$ ) buffer (30 mM MOPS,  
438 10 mM CaEGTA in 100 mM KCl, pH 7.2) or 0  $\mu\text{M}$  free  $\text{Ca}^{2+}$  (- $\text{Ca}^{2+}$ ) buffer (30 mM MOPS, 10 mM  
439 EGTA in 100 mM KCl, pH 7.2). The two photon excitation spectra were acquired as previously  
440 described<sup>2</sup>. Protein solution of 2 – 4  $\mu\text{M}$  concentration in + $\text{Ca}^{2+}$  or - $\text{Ca}^{2+}$  buffer was prepared and  
441 measured using an inverted microscope (IX81, Olympus) equipped with a 60 $\times$ , 1.2 NA water  
442 immersion objective (Olympus). Two photon excitation was obtained using an 80 MHz Ti-  
443 Sapphire laser (Chameleon Ultra II, Coherent) for spectra from 710 nm to 1080 nm. Fluorescence  
444 collected by the objective was passed through a short pass filter (720SP, Semrock) and a band  
445 pass filter (550BP200, Semrock), and detected by a fiber-coupled Avalanche Photodiode (APD)  
446 (SPCM\_AQRH-14, Perkin Elmer). The obtained two photon excitation spectra were normalized  
447 for 1  $\mu\text{M}$  concentration and further used to obtain the action cross-section spectra (AXS) with  
448 fluorescein as a reference<sup>34</sup>.

449 Fluorescence correlation spectroscopy (FCS) was used to obtain the 2P molecular brightness of  
450 the protein molecule. The molecular brightness was defined by the rate of fluorescence obtained  
451 per total number of emitting molecules. 50-200 nM protein solutions were prepared in + $\text{Ca}^{2+}$  buffer  
452 and excited with 940 nm wavelength at various power ranging from 2-30 mW for 200 seconds.  
453 The obtained fluorescence was collected by an APD and fed to an autocorrelator (Flex03LQ,  
454 Correlator.com). The obtained autocorrelation curve was fit on a diffusion model through an inbuilt  
455 Matlab function<sup>35</sup> to determine the number of molecules  $\langle N \rangle$  present in the focal volume. The 2-  
456 photon molecular brightness ( $\epsilon$ ) at each laser power was calculated as the average rate of  
457 fluorescence  $\langle F \rangle$  per emitting molecule  $\langle N \rangle$ , defined as  $\epsilon = \langle F \rangle / \langle N \rangle$  in kilocounts per second  
458 per molecule (kcpsm). As a function of laser power, the molecular brightness initially increases  
459 with increasing laser power, then levels off and decreases due to photobleaching or saturation of  
460 the protein chromophore in the excitation volume. The maximum or peak brightness achieved,  
461  $\langle \epsilon_{max} \rangle$ , represents a proxy for the photostability of a fluorophore.

## 462 ***In vitro* kinetics analysis by stopped-flow**

463 Rapid kinetic measurements of purified mNG-GECO1 and GCaMP6s were made using an  
464 Applied Photophysics SX-20 Stopped-flow Reaction Analyzer exciting at 488 nm with 2 nm  
465 bandwidth and collecting light at 520 nm through a 10 mm path at room temperature. Briefly, 2  
466  $\mu\text{M}$  of mNG-GECO1 and GCaMP6s proteins in 1 mM  $\text{Ca}^{2+}$  (30 mM MOPS, 100 mM KCl, pH 7.2)  
467 were rapidly mixed at 1:1 ratio with 50 mM of EGTA (same buffer as above) at room temperature.

468  $k_{\text{off}}$  values were determined by fitting a single exponential dissociation curve to the signal decay  
469 using Graphpad Prism, with units of  $\text{s}^{-1}$ . For  $k_{\text{on}}$ , both proteins buffered in 30 mM MOPS, 100 mM  
470 KCl, 50  $\mu\text{M}$  EGTA were rapidly mixed at 1:1 ratio with varying concentrations of  $\text{Ca}^{2+}$  produced  
471 by reciprocal dilutions of 10 mM EGTA and 10 mM CaEGTA. The measured fluorescence change  
472 overtime was fitted using a 2-phase association curve to obtain the slow and fast observed rate  
473 constants ( $k_{\text{obs}}$ ) for each free  $\text{Ca}^{2+}$  concentration. All measurements were done in triplicates, and  
474 values are reported as mean  $\pm$  s.e.m. where noted.

## 475 **Fluorescence live cell imaging**

476 **Imaging in HeLa cells.** We followed previously reported protocols for our  $\text{Ca}^{2+}$  imaging  
477 experiments<sup>36</sup>. Briefly, HeLa cells cultured in DMEM with 10% fetal bovine serum supplemented  
478 with penicillin-G potassium salt (50 units/mL) and streptomycin sulphate (50  $\mu\text{g}/\text{mL}$ ) were plated  
479 on collagen coated 35 mm glass bottom dishes. HeLa cells are transfected at 60% confluency  
480 with 1  $\mu\text{g}$  of pcDNA3.1(+) harboring the variant of interest using 2  $\mu\text{L}$  of TurboFect according to  
481 the manufacturer's recommendation. After overnight incubation at 37 °C with 5%  $\text{CO}_2$ , cells were  
482 washed twice with prewarmed Hank's balanced salt solution immediately before imaging.

483 Imaging of transfected HeLa cells was performed on an inverted Zeiss 200M microscope with  
484 Semrock filters (excitation 470/40, emission 525/50) and captured with an OrcaFlash 4.0 –  
485 C13440 (Hamamatsu). Images were acquired through a 40 $\times$  (N.A. 1.3) oil immersion lens using  
486 MetaMorph 7.8.0.0 software and an MS-2000 automated stage (Applied Scientific  
487 Instrumentation).

## 488 **Imaging in dissociated rat cortical neurons.**

489 The mNG-GECO1 indicator was compared to other GECIs in a field stimulation assay<sup>37</sup>. Neonatal  
490 (P0) rat pups were euthanized, and their cortices were dissected and dissociated using papain  
491 (Worthington). Cells were transfected by combining  $5 \times 10^5$  viable cells with 400 ng plasmid DNA  
492 and nucleofection solution electroporation cuvettes (Lonza). Electroporation was performed  
493 according to the manufacturer instructions. Cells were then plated at a density of  $5 \times 10^5$  cells/well  
494 in poly-D-lysine (PDL) coated 96-well plates. After 14-18 days in vitro, culture medium was  
495 exchanged for an imaging buffer solution with a drug cocktail to inhibit synaptic transmission<sup>37</sup>.  
496 The field stimulation assay was performed as previously described<sup>4, 20, 37</sup>. Briefly, neurons were  
497 field stimulated (1, 2, 3, 5, 10, 20, 40, 160 pulses at 83 Hz, 1 ms, 40V), and concurrently imaged  
498 with an electron multiplying charge coupled device (EMCCD) camera (Andor iXon DU897-BV,



499 198 Hz, 4x4 binning, 800 x 800  $\mu\text{m}$ , 1,400 frames). Reference images were taken after stimulation  
500 to perform cell segmentation during analysis. Illumination was delivered by blue light (470 nm,  
501 Cairn Research Ltd; excitation: 450-490 nm; emission: 500-550 nm; dichroic: 495 nm long-pass).  
502 The illumination power density was measured to be 19 mW/mm<sup>2</sup> at the sample. Stimulation pulses  
503 were synchronized with the camera using data acquisition cards (National Instruments), controlled  
504 with Wavesurfer software (<https://wavesurfer.janelia.org/>). Imaging was performed at room  
505 temperature. Data were analyzed using previously-developed MATLAB (Mathworks) scripts<sup>20, 37</sup>.

## 506 Ca<sup>2+</sup> imaging in human iPSC-derived cardiomyocytes

507 Human iPSC-derived cardiomyocytes (human iPSC Cardiomyocytes - male | ax2505) were  
508 purchased from Axol Bioscience. The 96 well glass-bottom plate or MatTek glass bottom dish  
509 (Ashland, MA, US) were first coated with Fibronectin/Gelatin (0.5% / 0.1%) at 37 °C for at least 1  
510 hour. The cells were plated and cultured for three days in Axol's Cardiomyocyte Maintenance  
511 Medium. The cells then were ready for final observation with Tyrode's buffer. For electrical  
512 stimulations, iPSC derived cardiomyocytes were plated on MatTek glass bottom dish (Ashland,  
513 MA, US) at 100,000 cells/well. Electrical stimulation was done with 10 V, 10 ms duration and 3  
514 seconds interval using myopacer (Ion optix c-pace ep). To image, an inverted microscope (DMI8,  
515 Leica) equipped with a 63 $\times$  objective lens (NA 1.4) and a multiwavelength LED light source (pE-  
516 4000, CoolLED) was used. iPSC derived cardiomyocytes were plated out as above, and then  
517 loaded with 5  $\mu\text{M}$  Fluo-4-AM (Thermo-Fisher, UK) at room temperature for 10 minutes, free dye  
518 was washed off by media replacement with pre-heated culture media, followed by imaging with  
519 iXon EMCCD (Andor) camera using 488 nm LED illumination. The GFP filter set (DS/FF02-  
520 485/20-25, T495lpxr dichroic mirror, and ET525/50 emission filter) was used for Fluo-4 and mNG-  
521 GECO1 observation.

## 522 Imaging of zebrafish larvae.

523 To demonstrate the sensitivity and brightness of mNG-GECO1 *in vivo*, we performed  
524 fluorescence imaging of Ca<sup>2+</sup> activity in a subset of neurons in larval zebrafish. Initially, we used  
525 the AB/WIK zebrafish strain for morphology studies (**Supplementary Fig. 4**), which were treated  
526 with 1-phenol-2-thiourea (PTU) to inhibit pigmentation, as described previously<sup>38</sup>. Later, *Casper*  
527 strains were available and 20 ng/ $\mu\text{L}$  DNA plasmids encoding mNG-GECO1 under the control of  
528 nuclear-localized *elavl3*/HuC promoter (Addgene: 59530) were injected into two-cell stage  
529 embryos of *Casper* mutant zebrafish<sup>33</sup> with 40 ng/ $\mu\text{l}$  Tol2 transposase mRNA (26) to generate F0  
530 transgenic zebrafish. Imaging experiments were performed using 6 day old embryos. Embryos

531 showing expression were treated with 1 mg/mL bath-applied  $\alpha$ -bungarotoxin (Thermo Fischer  
532 Scientific, B1601) dissolved in external solution for 30 seconds to block movement, and  
533 subsequently incubated with 80 mM 4-aminopyridine (4AP) for 10 minutes. After incubation, the  
534 larvae were embedded in 2% low melting temperature agarose to prevent motion. For earlier  
535 imaging (**Supplementary Fig. 4**) a Zeiss 700 confocal microscope was used with A-Plan 10x/0.25  
536 Ph1 M27 objective lens to obtain picture from the whole larvae (**Supplementary Fig. 4a**). For  
537 enlarged areas (**Supplementary Fig. 4b-e**), a Plan-Apochromat 20x/0.8 M27 lens was used.  
538 Later imaging was performed using a 488 nm laser (0.45  $\mu$ M) and a 525/50 nm emission filter at  
539 3 Hz using Zeiss 880 confocal microscope. The laser power was set to 2.3%, gain 720, and  
540 pinhole to 29.3% open. Image acquisition, data registration, segmentation and cell traces were  
541 handled using theSuite2p package in Python. All animal procedures were approved by the  
542 Institutional Animal Care and Use Committee at the HHMI Janelia Research Campus or by the  
543 Animal Care and Use Committee: Biosciences at the University of Alberta.

544 **Figures and Supplementary Data**

545

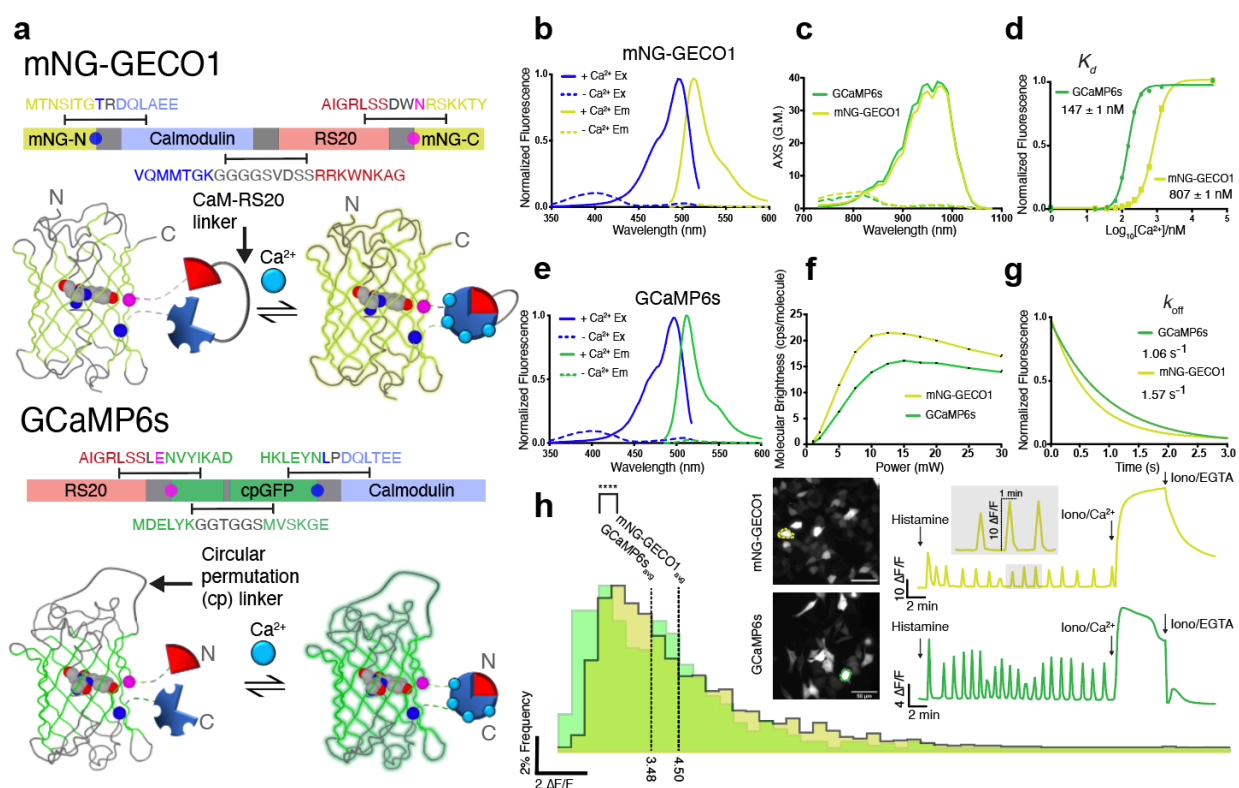

546

547 **Figure 1 Topology and *in vitro* characterization of mNG-GECO1 and GCaMP6s**

548 **a** Topology of non-circularly permuted mNG-GECO1 and circularly permuted GCaMP6s. Linker  
 549 regions are shown in grey and the two residues that flank the insertion site (residue 136 of mNG  
 550 in blue and residue 139 in magenta; numbering as in PDB ID 5LTR)<sup>23</sup> are shown as circles on  
 551 both the protein structure and gene schematics. The Ca<sup>2+</sup> responsive domains are shaded light  
 552 blue for CaM and light red for RS20. **b,e** Excitation and emission spectra for each indicator. **c** 2-  
 553 photon cross section for each indicator in Ca<sup>2+</sup> saturated or Ca<sup>2+</sup> free states. **d** Ca<sup>2+</sup> titration for  
 554 GCaMP6s (K<sub>d</sub> = 147 ± 1 nM) and mNG-GECO1 (807 ± 1 nM). **f** Dependence of two-photon  
 555 molecular brightness on excitation power intervals. **g** Stop-flow kinetics for each indicator showing  
 556 mNG-GECO1 (k<sub>off</sub> 1.57 s<sup>-1</sup>) and GCaMP6s (k<sub>off</sub> 1.06 s<sup>-1</sup>). **h** Characterization of histamine induced  
 557 Ca<sup>2+</sup> oscillations in HeLa cells with representative traces inset.

558

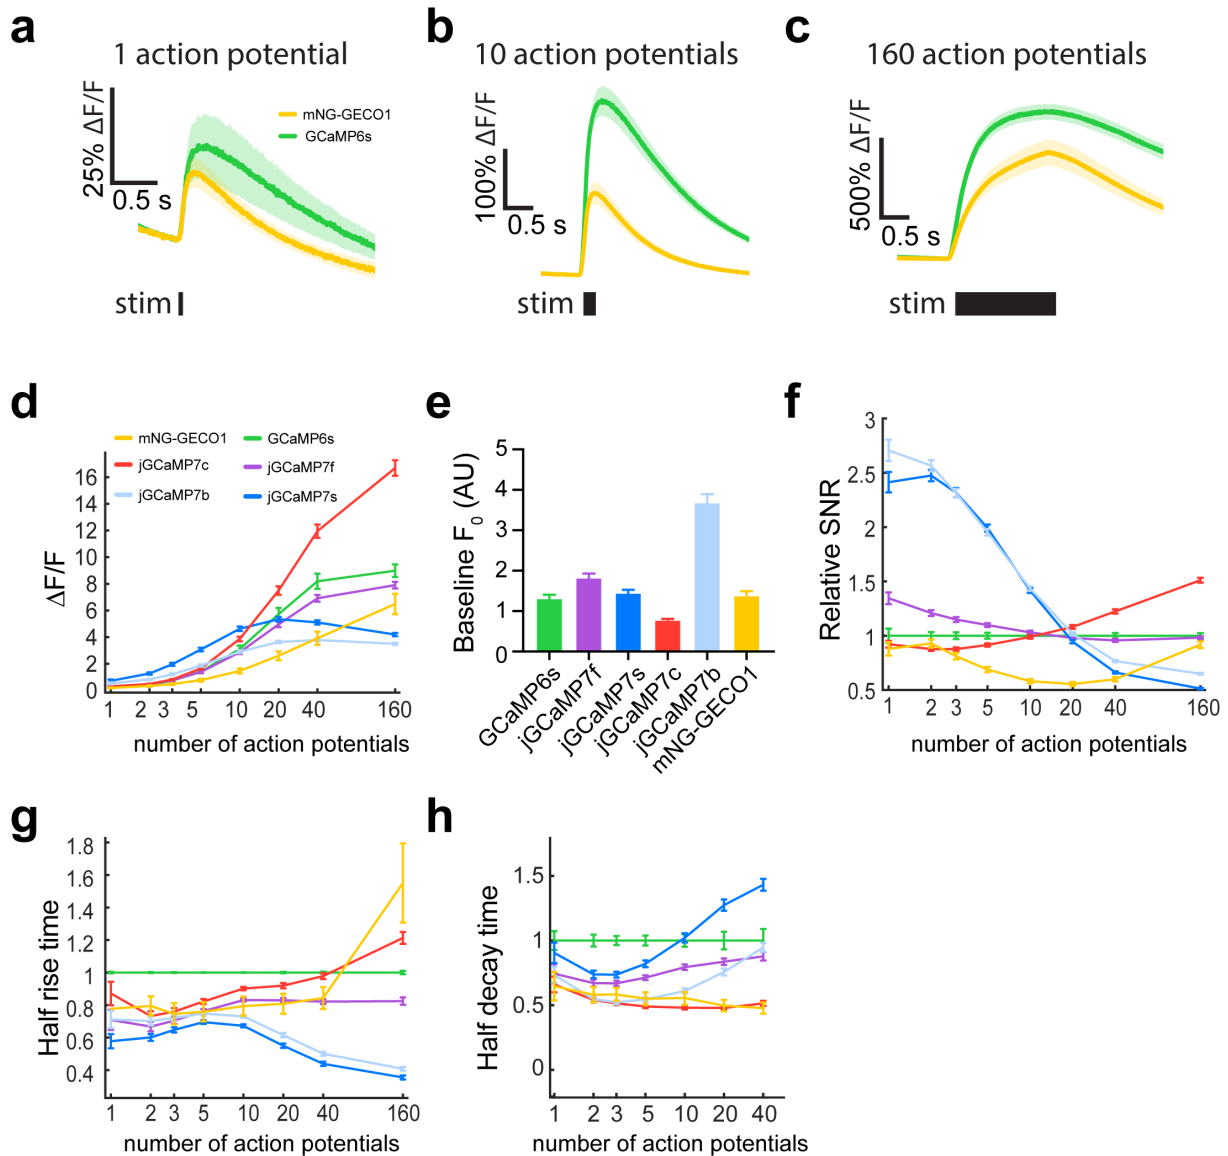

559

560 **Figure 2 Characterization of mNG-GECO1 and GCaMP series indicators in dissociated rat**  
561 **hippocampal neurons**

562 **a-c** Average responses to 1, 10, and 160 action potentials for mNG-GECO1 and GCaMP6s.  
563 Shaded areas correspond to s.e.m. for each trace. **d** Response amplitude  $\Delta F/F_0$  for mNG-GECO1  
564 and the GCaMP series of indicators in response to 1, 2, 3, 5, 10, 20, 40, and 160 action potentials.  
565 Data are presented normalized to  $\Delta F/F_0$  of GCaMP6s. **e** Baseline brightness for each indicator,  
566 defined as the mean raw fluorescence intensity of all neurons prior to the stimulus. **f** Relative  
567 SNR, defined as the peak raw fluorescence divided by the signal standard deviation prior to the  
568 stimulus, normalized to SNR of GCaMP6s. **g** Half-rise time normalized to GCaMP6s. **h** Half-decay

569 time normalized to GCaMP6s. The 160 action potential measurement was omitted because  
570 fluorescence levels generally did not return to baseline over the imaging period. For **a-h**, mNG-  
571 GECO1: 621 neurons, 15 wells; GCaMP6s: 937 neurons, 17 wells; jGCaMP7c: 2,551 neurons,  
572 44 wells; jGCaMP7b: 2,339 neurons, 47 wells; jGCaMP7f: 2,585 neurons, 48 wells; and  
573 jGCaMP7s: 2,249 neurons, 47 wells. Data in **d-h** shown as mean  $\pm$  s.e.m., see **Supplementary**  
574 **Table 3** for analyzed data.

575

576

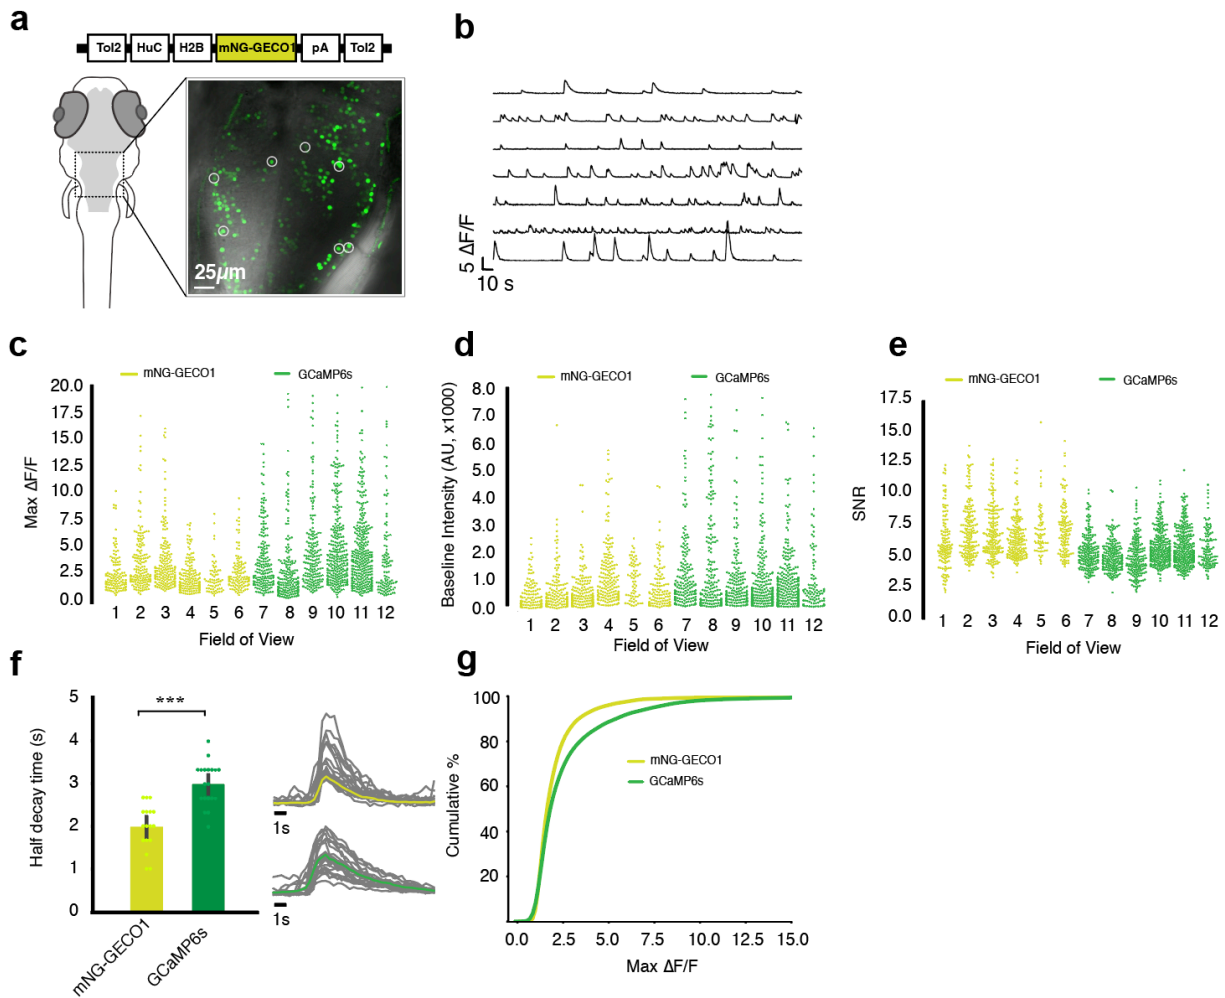

577

578 **Figure 3 Characterization of mNG-GECO1 and GCaMP6s in transgenic zebrafish hind brain**  
 579 **tissue.** **a** Schematic representation of Tol2[**HuC-H2B-mNG-GECO1**] construct and confocal  
 580 image of one fish (5 to 6 days post fertilization) with 7 region of interests (ROI) circled. **b** Traces  
 581 of ROI's from **a**). **c** Max  $\Delta F/F_0$  calculated by taking the max peak of each cell within the field of  
 582 interest over 5 minutes; six ROI's each are used from 5 independent fish expressing mNG-  
 583 GECO1 and 5 fish expressing GCaMP6s. **d** Baseline fluorescence intensity of each cell within all  
 584 ROI's from 5 fish; confocal settings are kept consistent between GCaMP6s and mNG-GECO1  
 585 imaging. **e** Signal-to-noise ratio (SNR) computed by dividing  $\Delta F/F_0$  by raw standard deviation of  
 586 each cell across 6 FOV's each for both sensors. **f** Average half decay time plotted for mNG-  
 587 GECO1 ( $n = 17$ ) and GCaMP6s ( $n = 19$ ) by averaging randomly selected peaks. **g** Cumulative

588 distribution of mNG-GECO1 vs. GCaMP6s. All cells are arranged in incremental order of  $\Delta F/F_0$   
589 and plotted with respect to their  $\Delta F/F_0$  and their position in the order (%).

590 **Supplementary Figures and Tables**

591 **Supplementary Table 1. In vitro characterization of mNG-GECO1 and GCaMP6s.** mNG,  
 592 mNG-GECO1, and GCaMP6s were purified and tested in parallel. mNG was used as a standard  
 593 for brightness and quantum yield determination.

| Indicator                                                                                  | Excitation Max (nm) | Emission Max (nm) | Quantum Yield    | Extinction Coefficient | Brightness <sup>a</sup> | Brightness Relative to GCaMP6s | Brightness Relative to mNG | $\Delta F/F_0$ | $K_d$ (nM)   | $k_{off}$ (s <sup>-1</sup> ) |
|--------------------------------------------------------------------------------------------|---------------------|-------------------|------------------|------------------------|-------------------------|--------------------------------|----------------------------|----------------|--------------|------------------------------|
| <b>mNeonGreen</b>                                                                          | 506                 | 517               | 0.8 <sup>b</sup> | 112,000<br>+/- 900     | 90                      | 205%                           | 100%                       | NA             | NA           | NA                           |
| <b>mNG-GECO1</b>                                                                           | 496                 | 513               | 0.69<br>+/- 0.01 | 102,000<br>+/- 2,700   | 70                      | 159%                           | 78%                        | 35             | 807<br>+/- 1 | 1.57<br>+/- 0.01             |
| <b>GCaMP6s</b>                                                                             | 497                 | 512               | 0.59<br>+/- 0.02 | 74,000<br>+/- 500      | 44                      | 100%                           | 49%                        | 39             | 147<br>+/- 1 | 1.06<br>+/- 0.01             |
| <sup>a</sup> Product of $\epsilon$ in $\text{mM}^{-1}\text{cm}^{-1}$ and $\Phi$ (no units) |                     |                   |                  |                        |                         |                                |                            |                |              |                              |
| <sup>b</sup> From Ref. <sup>21</sup>                                                       |                     |                   |                  |                        |                         |                                |                            |                |              |                              |

594



595 **Supplementary Table 2. Characterization of Ca<sup>2+</sup>-dependent fluorescence of mNG-GECO1**  
596 **and GCaMP6s in HeLa cells.** Cells were treated with histamine (abb. His), then with  
597 Ca<sup>2+</sup>/ionomycin (abb. Ca<sup>2+</sup>), and then with EGTA/ionomycin (abb. EGTA). n is the total number of  
598 cells recorded over five independent transfections. The oscillations were detected in all cells with  
599 a prominence of greater than 0.5 using a Matlab script. Errors are s.d.

| Protein   | Number of HeLa cells (n) | Total Number of oscillations detected | Maximum Ca <sup>2+</sup> to minimum EGTA $\Delta F/F_0$ | Maximum His to minimum His ratio | Maximum His to maximum Ca <sup>2+</sup> ratio |
|-----------|--------------------------|---------------------------------------|---------------------------------------------------------|----------------------------------|-----------------------------------------------|
| mNG-GECO1 | 137                      | 1624                                  | 4.50 ± 2.96                                             | 48.8 ± 15.1                      | 16.8 ± 10.5                                   |
| GCaMP6s   | 99                       | 687                                   | 3.48 ± 2.40                                             | 16.7 ± 5.2                       | 12.8 ± 6.11                                   |

600

601 **Supplementary Table 3. mNG-GECO1 comparison with GCaMP series sensors in**  
 602 **dissociated rat hippocampal neurons.** Median values were calculated per well and mean (of  
 603 medians)  $\pm$  s.e.m. are presented. SNR values were calculated per individual cells, and median  $\pm$   
 604 s.e.m are shown.

| Protein          | 1 AP<br>$\Delta F/F_0$<br>amplitude | 3 AP<br>$\Delta F/F_0$<br>amplitude | 10 AP<br>$\Delta F/F_0$<br>amplitude | 160 AP<br>$\Delta F/F_0$<br>amplitude | Baseline<br>Brightness<br>(Fluorescence<br>Intensity<br>(AU)) | Half<br>rise<br>time 3<br>APs<br>(ms) | Half<br>decay<br>time 3<br>APs (ms) | SNR 1 APs       | SNR 3 APs       |
|------------------|-------------------------------------|-------------------------------------|--------------------------------------|---------------------------------------|---------------------------------------------------------------|---------------------------------------|-------------------------------------|-----------------|-----------------|
| <b>mNG-GECO1</b> | 0.19 $\pm$ 0.04                     | 0.5 $\pm$ 0.07                      | 1.5 $\pm$ 0.19                       | 6.5 $\pm$ 0.8                         | 1374 $\pm$ 31                                                 | 49 $\pm$ 1                            | 582 $\pm$ 12                        | 8.9 $\pm$ 0.01  | 20.3 $\pm$ 0.02 |
| <b>GCaMP6s</b>   | 0.27 $\pm$ 0.09                     | 0.7 $\pm$ 0.08                      | 3.1 $\pm$ 0.26                       | 9.0 $\pm$ 0.47                        | 1302 $\pm$ 26                                                 | 65 $\pm$ 2                            | 1,000 $\pm$ 36                      | 10.1 $\pm$ 0.07 | 25.0 $\pm$ 0.03 |
| <b>jGCaMP7b</b>  | 0.6 $\pm$ 0.07                      | 1.2 $\pm$ 0.08                      | 2.9 $\pm$ 0.1                        | 3.5 $\pm$ 0.09                        | 3673 $\pm$ 32                                                 | 47 $\pm$ 0.1                          | 523 $\pm$ 2                         | 27.4 $\pm$ 0.01 | 57.8 $\pm$ 0.01 |
| <b>jGCaMP7c</b>  | 0.3 $\pm$ 0.03                      | 0.8 $\pm$ 0.04                      | 3.9 $\pm$ 0.2                        | 16.7 $\pm$ 0.58                       | 770 $\pm$ 6                                                   | 49 $\pm$ 0.1                          | 513 $\pm$ 1                         | 9.3 $\pm$ 0.003 | 21.9 $\pm$ 0.01 |
| <b>jGCaMP7f</b>  | 0.3 $\pm$ 0.06                      | 0.8 $\pm$ 0.05                      | 2.9 $\pm$ 0.1                        | 7.9 $\pm$ 0.25                        | 1797 $\pm$ 16                                                 | 46 $\pm$ 0.1                          | 669 $\pm$ 2                         | 13.6 $\pm$ 0.01 | 28.7 $\pm$ 0.01 |
| <b>jGCaMP7s</b>  | 0.7 $\pm$ 0.10                      | 2.0 $\pm$ 0.11                      | 4.6 $\pm$ 0.17                       | 4.2 $\pm$ 0.12                        | 1397 $\pm$ 11                                                 | 42 $\pm$ 0.1                          | 736 $\pm$ 2                         | 24.5 $\pm$ 0.01 | 57.9 $\pm$ 0.02 |

605

606

607 **Supplementary Table 4. mNG-GECO1 comparison with GCaMP6s in larval zebrafish 6 dpf.**

608 Mean values were calculated for the total number of cells (ROI's) across six FOV's in five  
609 independent fish. Mean  $\pm$  s.e.m. are presented. For max  $\Delta F/F_0$ , the maximum  $\Delta F/F_0$  from each  
610 cell is used. For baseline brightness, the raw intensity of the indicator under the same set of  
611 imaging conditions is used. For half decay time, 17 and 19 represented cells were used for mNG-  
612 GECO1 and GCaMP6s, respectively. The difference in max  $\Delta F/F_0$  for the two indicators is  
613 significant (Kolmogorov-Smirnov statistic = 0.218, p-value =  $1.79 \times 10^{-21}$ ). The difference in  
614 baseline brightness for the two indicators is significant (Kolmogorov-Smirnov statistic = 0.100, p-  
615 value  $\approx 7.31 \times 10^{-5}$ ). The difference in half decay time for the two indicators is significant  
616 (Kolmogorov-Smirnov statistic = 0.666, p-value  $\approx 3.00 \times 10^{-4}$ ).

| Protein   | # of biological replicates | # of total field of views (FOV) | # of total cells (N) | Max $\Delta F/F_0$ | Baseline Brightness ( $\times 1000$ ) (AU) | Signal to noise ratio (SNR) | Half decay time ( $s^{-1}$ ) (n) |
|-----------|----------------------------|---------------------------------|----------------------|--------------------|--------------------------------------------|-----------------------------|----------------------------------|
| mNG-GECO1 | 5                          | 6                               | 834                  | 3.09<br>$\pm 0.08$ | 0.95<br>$\pm 0.03$                         | 6.63<br>$\pm 0.07$          | 1.98 $\pm$<br>0.12<br>(17)       |
| GCaMP6s   | 5                          | 6                               | 1280                 | 4.56<br>$\pm 0.11$ | 1.41<br>$\pm 0.05$                         | 5.25<br>$\pm 0.04$          | 3.00 $\pm$<br>0.12<br>(19)       |

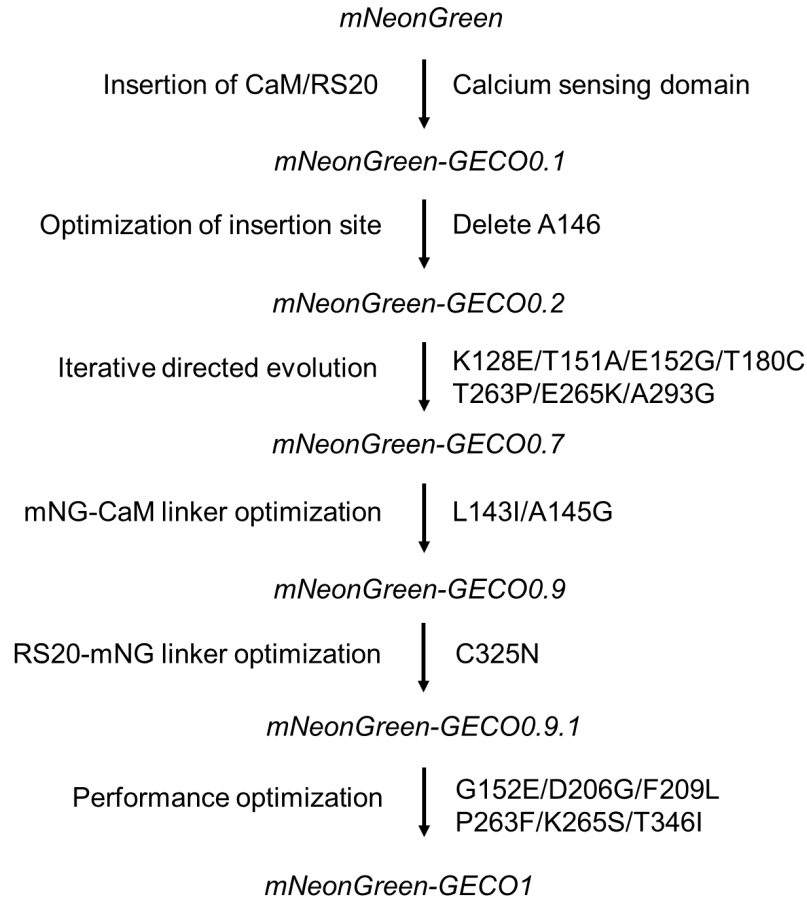

617

## 618 **Supplementary Figure 1 Overview of mNG-GECO1 development**

619 Lineage of mNG-GECO variants starting from initial insertion of Ca<sup>2+</sup> sensing domain into mNG,  
620 and ending with the final mNG-GECO1 variant.

|               |             |            |            |            |            |            |                                      |
|---------------|-------------|------------|------------|------------|------------|------------|--------------------------------------|
|               |             | 20         |            | 40         |            | 60         |                                      |
| mNG-GECO0.1   | MVSKGEEDNM  | ASLPATHELH | IFGSI      | INGVDF     | DMVGQGTGNP | NDGYEELNLK | STKGD LQFSP 60                       |
| mNG-GECO0.2   | MVSKGEEDNM  | ASLPATHELH | IFGSI      | INGVDF     | DMVGQGTGNP | NDGYEELNLK | STKGD LQFSP 60                       |
| mNG-GECO0.7   | MVSKGEEDNM  | ASLPATHELH | IFGSI      | INGVDF     | DMVGQGTGNP | NDGYEELNLK | STKGD LQFSP 60                       |
| mNG-GECO0.9   | MVSKGEEDNM  | ASLPATHELH | IFGSI      | INGVDF     | DMVGQGTGNP | NDGYEELNLK | STKGD LQFSP 60                       |
| mNG-GECO0.9.1 | MVSKGEEDNM  | ASLPATHELH | IFGSI      | INGVDF     | DMVGQGTGNP | NDGYEELNLK | STKGD LQFSP 60                       |
| mNG-GECO1     | MVSKGEEDNM  | ASLPATHELH | IFGSI      | INGVDF     | DMVGQGTGNP | NDGYEELNLK | STKGD LQFSP 60                       |
|               |             | 80         |            | 100        |            | 120        |                                      |
| mNG-GECO0.1   | WILVPHI     | GYG        | FHQYLPY    | PDG        | MSPFQAAMVD | GSGYQVHRTM | QFEDGASLTV NYRYTYEGSH 120            |
| mNG-GECO0.2   | WILVPHI     | GYG        | FHQYLPY    | PDG        | MSPFQAAMVD | GSGYQVHRTM | QFEDGASLTV NYRYTYEGSH 120            |
| mNG-GECO0.7   | WILVPHI     | GYG        | FHQYLPY    | PDG        | MSPFQAAMVD | GSGYQVHRTM | QFEDGASLTV NYRYTYEGSH 120            |
| mNG-GECO0.9   | WILVPHI     | GYG        | FHQYLPY    | PDG        | MSPFQAAMVD | GSGYQVHRTM | QFEDGASLTV NYRYTYEGSH 120            |
| mNG-GECO0.9.1 | WILVPHI     | GYG        | FHQYLPY    | PDG        | MSPFQAAMVD | GSGYQVHRTM | QFEDGASLTV NYRYTYEGSH 120            |
| mNG-GECO1     | WILVPHI     | GYG        | FHQYLPY    | PDG        | MSPFQAAMVD | GSGYQVHRTM | QFEDGASLTV NYRYTYEGSH 120            |
|               |             | 140        |            | 160        |            | 180        |                                      |
| mNG-GECO0.1   | INGEAQVKGT  | GFPADGPVMT | NSLTA      | ATRDQ      | LTEEQIAEFK | EAFSLFDKDG | DGTITTKELG 180                       |
| mNG-GECO0.2   | INGEAQVKGT  | GFPADGPVMT | NSLTA      | -TRDQ      | LTEEQIAEFK | EAFSLFDKDG | DGTITTKELG 179                       |
| mNG-GECO0.7   | INGEAQVEGT  | GFPADGPVMT | NSLTA      | -TRDQ      | LAGEQIAEFK | EAFSLFDKDG | DGTITTKELG 179                       |
| mNG-GECO0.9   | INGEAQVEGT  | GFPADGPVMT | NSITG      | -TRDQ      | LAGEQIAEFK | EAFSLFDKDG | DGTITTKELG 179                       |
| mNG-GECO0.9.1 | INGEAQVEGT  | GFPADGPVMT | NSITG      | -TRDQ      | LAGEQIAEFK | EAFSLFDKDG | DGTITTKELG 179                       |
| mNG-GECO1     | INGEAQVEGT  | GFPADGPVMT | NSITG      | -TRDQ      | LAEEQIAEFK | EAFSLFDKDG | DGTITTKELG 179                       |
|               |             | 200        |            | 220        |            | 240        |                                      |
| mNG-GECO0.1   | TVLRS LGQNP | TEAELQDMIN | EVDADGDGTF | DFPEFLT    | MMA        | RKMNDADSEE | EIREAFRVFD 240                       |
| mNG-GECO0.2   | TVLRS LGQNP | TEAELQDMIN | EVDADGDGTF | DFPEFLT    | MMA        | RKMNDADSEE | EIREAFRVFD 239                       |
| mNG-GECO0.7   | CVLRS LGQNP | TEAELQDMIN | EVDADGDGTF | DFPEFLT    | MMA        | RKMNDADSEE | EIREAFRVFD 239                       |
| mNG-GECO0.9   | CVLRS LGQNP | TEAELQDMIN | EVDADGDGTF | DFPEFLT    | MMA        | RKMNDADSEE | EIREAFRVFD 239                       |
| mNG-GECO0.9.1 | CVLRS LGQNP | TEAELQDMIN | EVDADGDGTF | DFPEFLT    | MMA        | RKMNDADSEE | EIREAFRVFD 239                       |
| mNG-GECO1     | CVLRS LGQNP | TEAELQDMIN | EVDADGGGTL | DFPEFLT    | MMA        | RKMNDADSEE | EIREAFRVFD 239                       |
|               |             | 260        |            | 280        |            | 300        |                                      |
| mNG-GECO0.1   | KDNGYI      | GAA        | ELRHVMTDLG | EKL        | TDEEVDE    | MIRVADIDGD | GQVNYEEFVQ MMTAKGGGGS 300            |
| mNG-GECO0.2   | KDNGYI      | GAA        | ELRHVMTDLG | EKL        | TDEEVDE    | MIRVADIDGD | GQVNYEEFVQ MMTAKGGGGS 299            |
| mNG-GECO0.7   | KDNGYI      | GAA        | ELRHVMTDLG | EKL        | PK         | KEVDE      | MIRVADIDGD GQVNYEEFVQ MMTGKGGGGS 299 |
| mNG-GECO0.9   | KDNGYI      | GAA        | ELRHVMTDLG | EKL        | PK         | KEVDE      | MIRVADIDGD GQVNYEEFVQ MMTGKGGGGS 299 |
| mNG-GECO0.9.1 | KDNGYI      | GAA        | ELRHVMTDLG | EKL        | PK         | KEVDE      | MIRVADIDGD GQVNYEEFVQ MMTGKGGGGS 299 |
| mNG-GECO1     | KDNGYI      | GAA        | ELRHVMTDLG | EKL        | F          | DSEVDE     | MIRVADIDGD GQVNYEEFVQ MMTGKGGGGS 299 |
|               |             | 320        |            | 340        |            | 360        |                                      |
| mNG-GECO0.1   | VDSSRRKWNK  | AGHAVRAIGR | LSSDWC     | RSKK       | TYPNDKTIIS | TFKWSYTTGN | GKRYRSTART 360                       |
| mNG-GECO0.2   | VDSSRRKWNK  | AGHAVRAIGR | LSSDWC     | RSKK       | TYPNDKTIIS | TFKWSYTTGN | GKRYRSTART 359                       |
| mNG-GECO0.7   | VDSSRRKWNK  | AGHAVRAIGR | LSSDWC     | RSKK       | TYPNDKTIIS | TFKWSYTTGN | GKRYRSTART 359                       |
| mNG-GECO0.9   | VDSSRRKWNK  | AGHAVRAIGR | LSSDWC     | RSKK       | TYPNDKTIIS | TFKWSYTTGN | GKRYRSTART 359                       |
| mNG-GECO0.9.1 | VDSSRRKWNK  | AGHAVRAIGR | LSSDWC     | RSKK       | TYPNDKTIIS | TFKWSYTTGN | GKRYRSTART 359                       |
| mNG-GECO1     | VDSSRRKWNK  | AGHAVRAIGR | LSSDWN     | RSKK       | TYPNDKTIIS | TFKWSYITGN | GKRYRSTART 359                       |
|               |             | 380        |            | 400        |            |            |                                      |
| mNG-GECO0.1   | TYTFAKPM    | AA         | NYLKNQPMYV | FRKTELKHSK | TELNFKEWQK | AFTDVMGMDE | LYK 413                              |
| mNG-GECO0.2   | TYTFAKPM    | AA         | NYLKNQPMYV | FRKTELKHSK | TELNFKEWQK | AFTDVMGMDE | LYK 412                              |
| mNG-GECO0.7   | TYTFAKPM    | AA         | NYLKNQPMYV | FRKTELKHSK | TELNFKEWQK | AFTDVMGMDE | LYK 412                              |
| mNG-GECO0.9   | TYTFAKPM    | AA         | NYLKNQPMYV | FRKTELKHSK | TELNFKEWQK | AFTDVMGMDE | LYK 412                              |
| mNG-GECO0.9.1 | TYTFAKPM    | AA         | NYLKNQPMYV | FRKTELKHSK | TELNFKEWQK | AFTDVMGMDE | LYK 412                              |
| mNG-GECO1     | TYTFAKPM    | AA         | NYLKNQPMYV | FRKTELKHSK | TELNFKEWQK | AFTDVMGMDE | LYK 412                              |

621

## 622 Supplementary Figure 2 Sequence alignment of mNG-GECO variants

623 Alignment of mNG-GECO variants 0.2, 0.7, 0.9, 0.9.1, and 1. Similar to the topological  
 624 representation in **Fig. 1a**, mNG barrel (yellow), CaM (light blue), RS20 (green), linker  
 625 regions (black), mutations (red), and the chromophore forming residues (black box over  
 626 “GYG”). Also highlighted are the two residues that flank the insertion site (residue 136 of  
 627 mNG in purple and residue 139 in magenta; numbering as in PDB ID 5LTR), which are  
 628 shown as circles in both the protein structure and gene schematic in **Fig. 1a**.

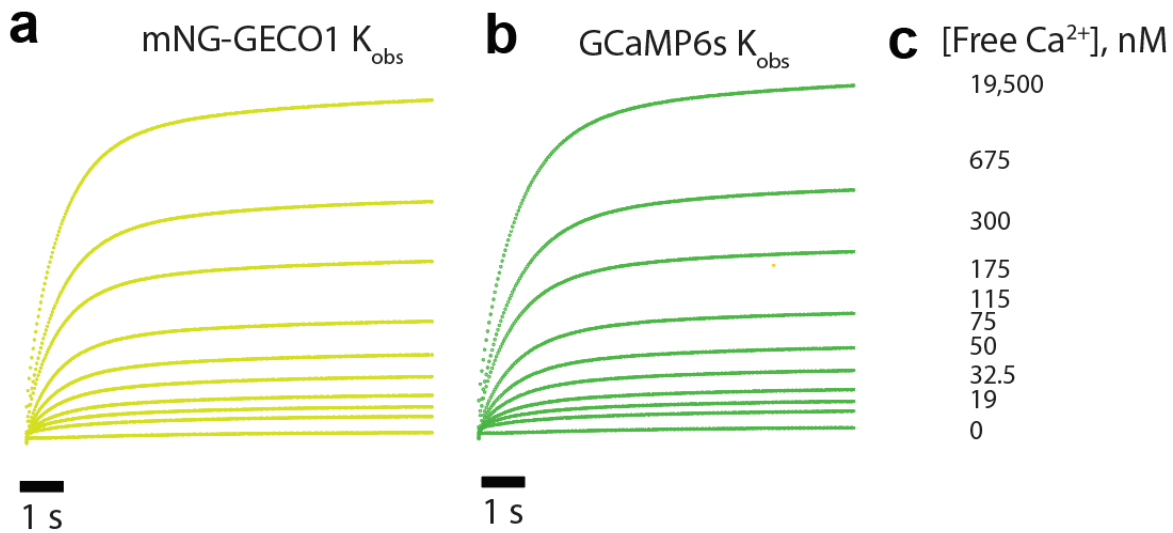

629

630 **Supplementary Figure 3**  $K_{on}$ , (observed) traces of mNG-GECO1 and GCaMP6s purified protein  
631 using Photophysics SX-20 Stopped-flow. Each protein buffered in 30 mM MOPS, 100 mM KCl,  
632 50  $\mu$ M EGTA is rapidly mixed at 1:1 ratio with varying concentrations of  $Ca^{2+}$  produced by  
633 reciprocal dilutions of 10 mM EGTA and 10 mM CaEGTA. **a** mNG-GECO1 change in fluorescence  
634 over time as  $Ca^{2+}$  is rapidly mixed. **b** GCaMP6s change in fluorescence over time as  $Ca^{2+}$  is  
635 rapidly mixed. **c** Final free- $Ca^{2+}$  concentrations produced after reciprocal dilutions. mNG-GECO1  
636 and GCaMP6s fit with a double exponential curve due to a slow rate limiting step likely caused by  
637 the conformational change of the proteins upon binding to  $Ca^{2+}$ . Both sensors have a similar  $t_{1/2}$   
638 for physiologically relevant  $Ca^{2+}$  concentrations.

639

640

641

642

643

644

645

646

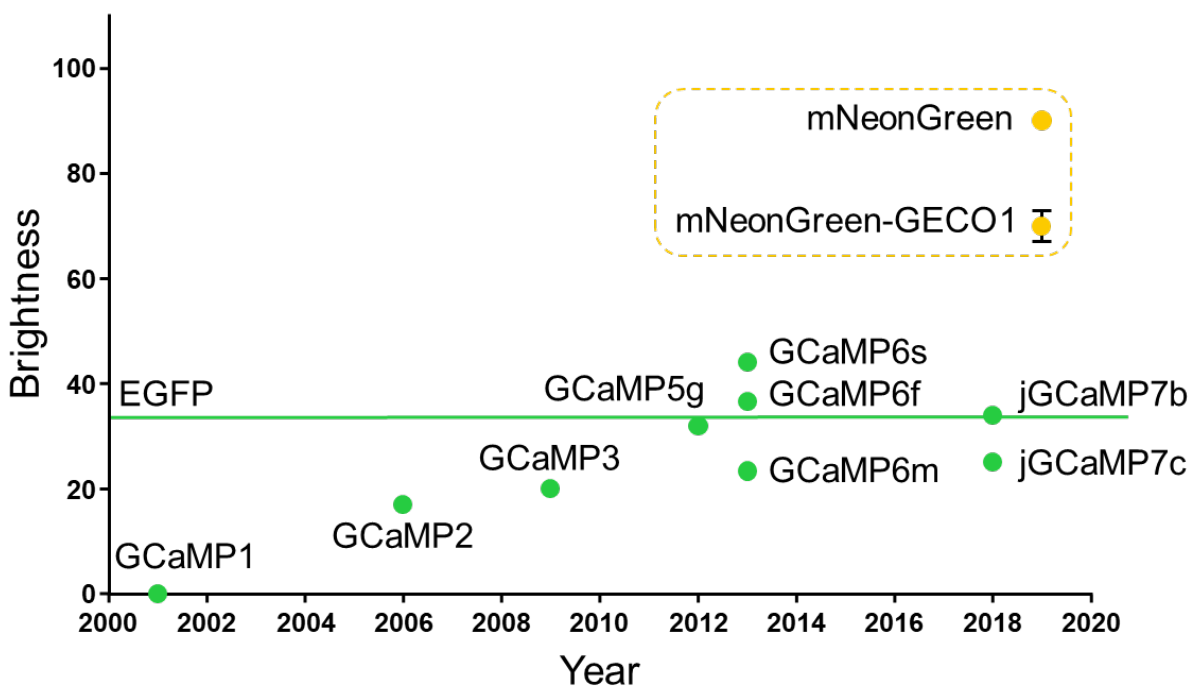

647

648 **Supplementary Figure 4 *In vitro* brightness comparison of mNG-GECO1 to GCaMP series**

649 1P purified protein brightness of first generation mNG-GECO1 compared to the GCaMP series of  
650 Ca<sup>2+</sup> indicators. mNG-GECO1 is substantially brighter *in vitro* than the highly-engineered GCaMP  
651 series, which is roughly as bright as its own scaffold, EGFP.

652

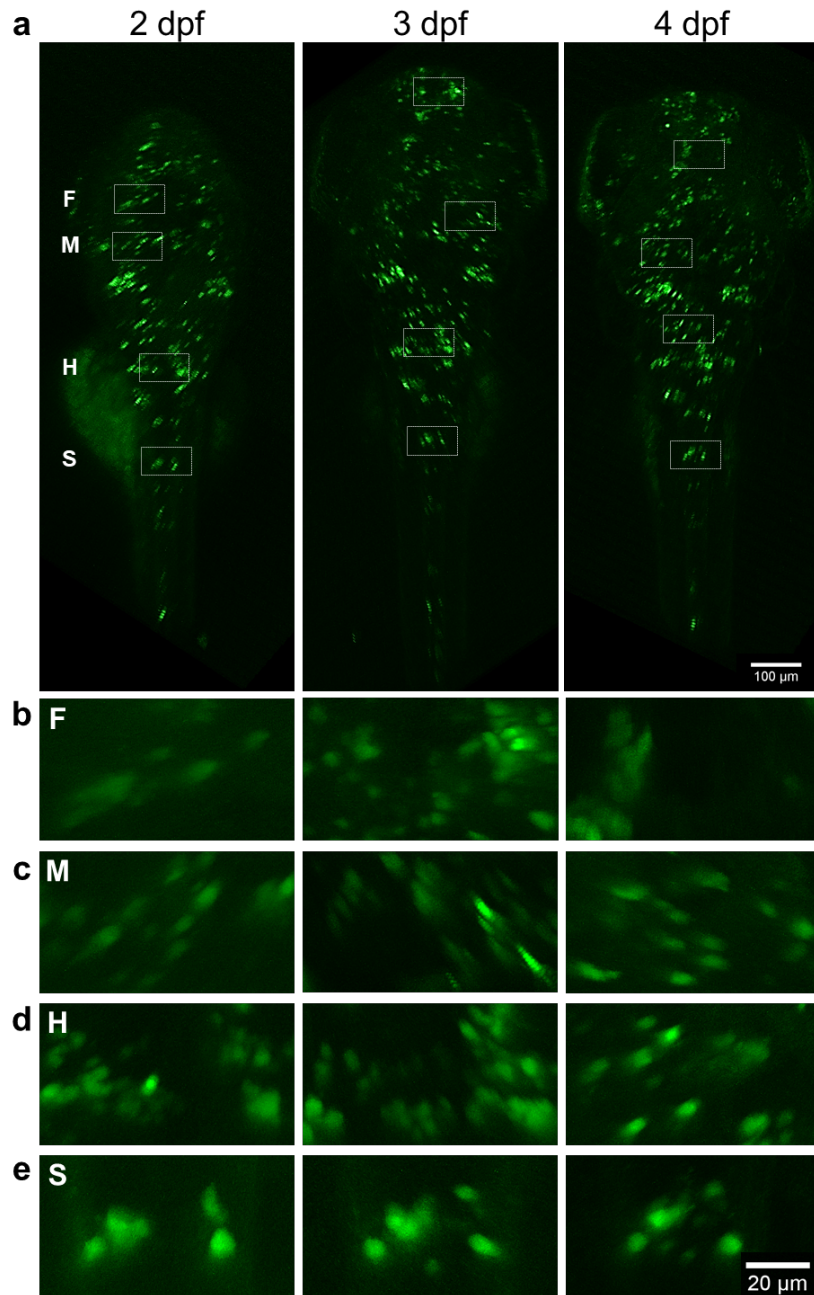

653

654 **Supplementary Figure 5 mNG-GECO1 expression profile in zebrafish larvae.** Transient  
655 expression of mNG-GECO1 in Tg[elavl3:mNG-GECO1] zebrafish at 2, 3 and 4 days post-  
656 fertilization. **a** Dorsal view of confocal z-projections obtained from the whole larvae. Small dashed  
657 squares mark areas that have been enlarged and presented in b-e. **b-e** Shows areas in the  
658 forebrain (F), midbrain (M), hindbrain (H) and spine (S). Scale bars are 100 μm in A and 20 μm  
659 in b-e as shown bottom right in e.

660



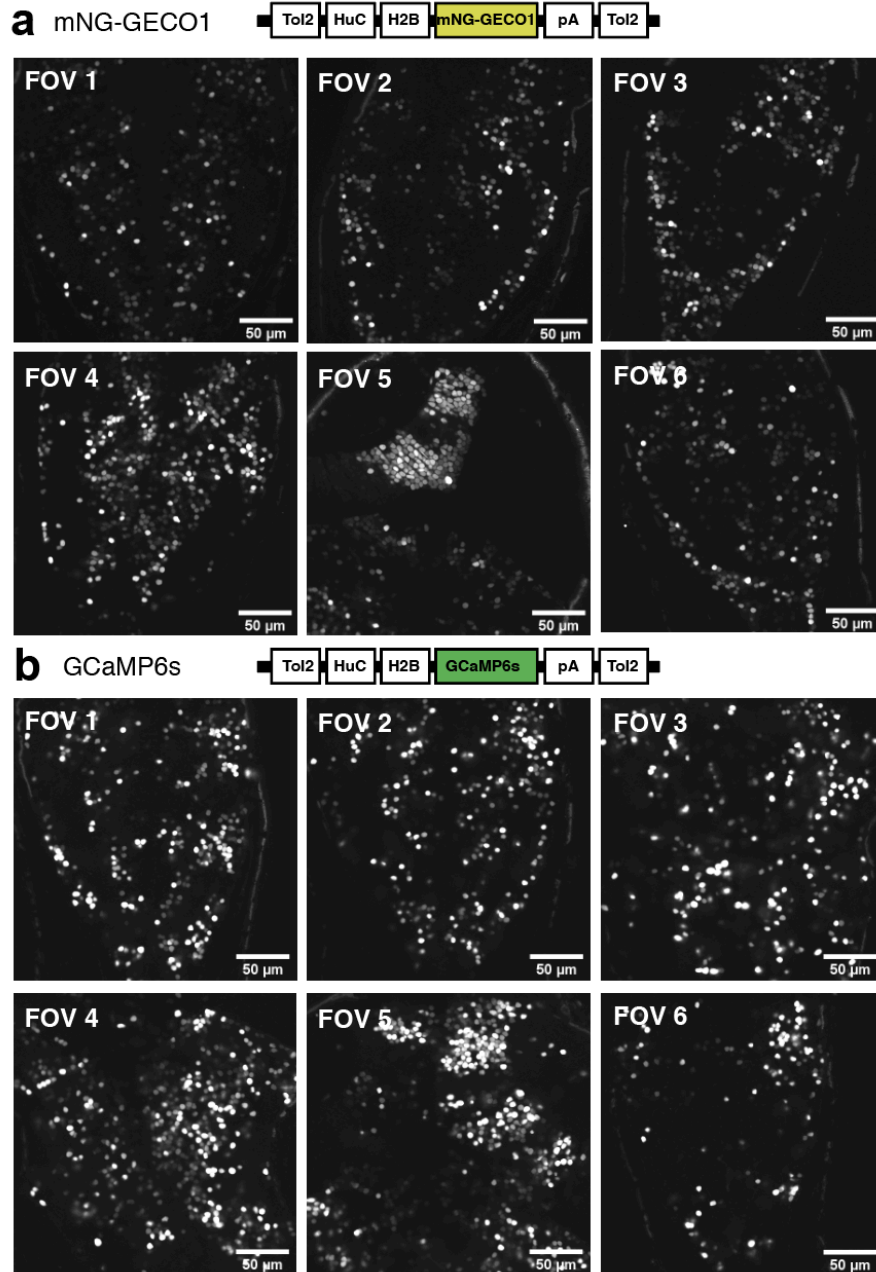

661

662 **Supplementary Figure 6 mNG-GECO1 and GCaMP6s field of views (FOV) in zebrafish**  
663 **larvae used for quantification.** Transient expression of mNG-GECO1 and GCaMP6s in  
664 zebrafish at 6 days post-fertilization. Each FOV image is an average intensity of a 5 minute  
665 recording encoding 900 frames. The relative fluorescence intensity is to-scale between the two  
666 sensors. **a** FOVs from larvae expressing mNG-GECO1. **b** FOVs from larvae expressing  
667 GCaMP6s. Scale bar is 50 µm for all images.

668

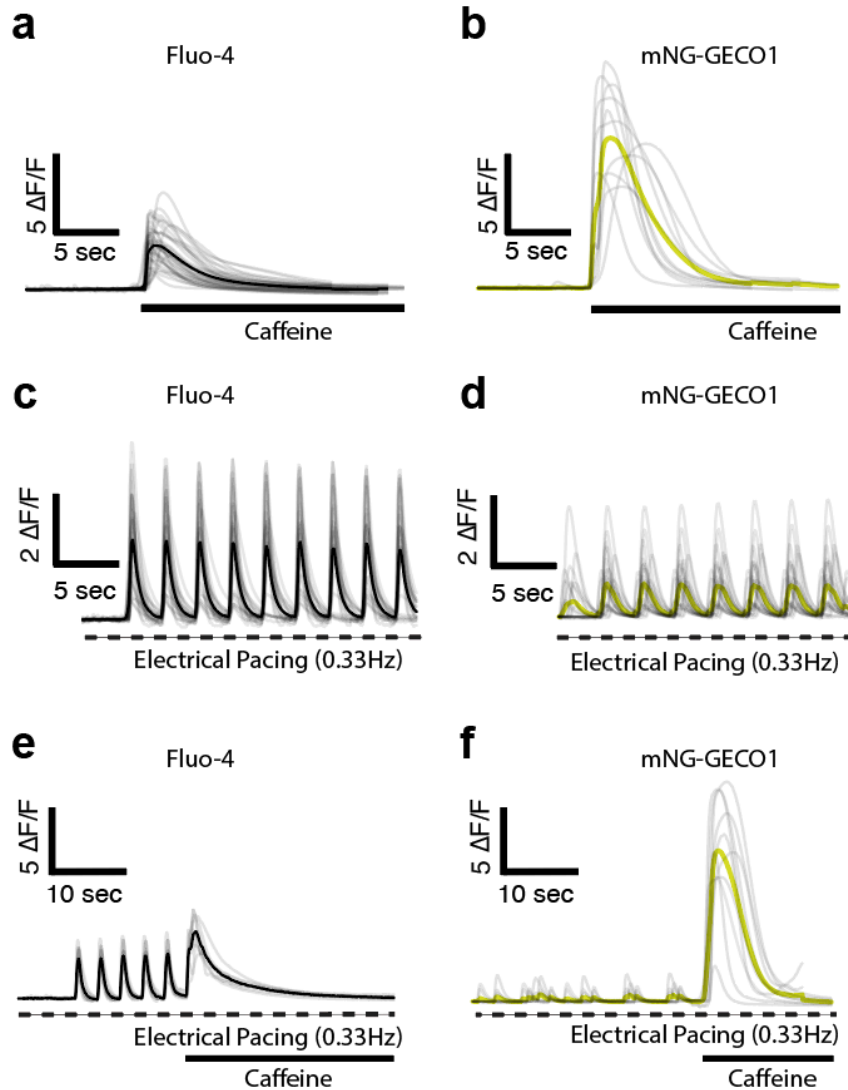

669

670 **Supplementary Figure 7** Comparison of Fluo-4  $\text{Ca}^{2+}$  dye and mNG-GECO1 in human iPSC-  
671 derived cardiomyocytes. **a, b** Single cell  $\text{Ca}^{2+}$  transient traces from iPSC-CM's loaded with the  
672 Fluo-4  $\text{Ca}^{2+}$  dye ( $n = 38$  regions of interests [ROI's]) or mNG-GECO1 ( $n=11$  ROI's), respectively.  
673  $\text{Ca}^{2+}$  transients were evoked using 20 mM caffeine. **c, d**  $\text{Ca}^{2+}$  transients evoked by electrical  
674 pacing were recorded with the Fluo-4  $\text{Ca}^{2+}$  dye ( $n = 25$  ROI's) or mNG-GECO1 ( $n = 22$  ROI's),  
675 respectively. Cells were stimulated electrically at 0.33 Hz and imaged at 10 Hz frame rate. **e, f**  
676  $\text{Ca}^{2+}$  transients evoked by electrical pacing (0.33 Hz) and caffeine treatment (10 mM) were  
677 recorded at 10 Hz with the Fluo-4  $\text{Ca}^{2+}$  dye ( $n = 8$  ROI's) or mNG-GECO1 ( $n = 8$  ROI's),  
678 respectively.
